# Supplementary material for: Synthesis, characterization,in silicomolecular docking, and antibacterial activities of some new nitrogen-heterocyclic analogues based on ap-phenolic unit
Source: Royal Society of Chemistry journal article supplement (doi:10.1039/d2ra01794f), 2022-01-01
Supplement: d2ra01794f1.pdf [file d2ra01794f1.pdf]

## Synthesis, Characterization, *In silico* Molecular Docking, and Antibacterial Activities of Some New Nitrogen-heterocyclic Analogues Based *p*-Phenolic Unit

Abdel Haleem M. Hussein<sup>1</sup>, Abu-Bakr A. El-Adasy<sup>1</sup>, Ahmed M. El-Saghier<sup>2</sup>, M. Olish<sup>1</sup>, and Aboubakr H. Abdelmonsef<sup>3\*</sup>

<sup>1</sup>Chemistry Department, Faculty of Science, Al-Azhar University, Assiut, Egypt

<sup>2</sup>Chemistry Department, Faculty of Science, Sohag University, 82524 Sohag, Egypt

<sup>3</sup>Chemistry Department, Faculty of Science, South Valley University, 83523 Qena, Egypt

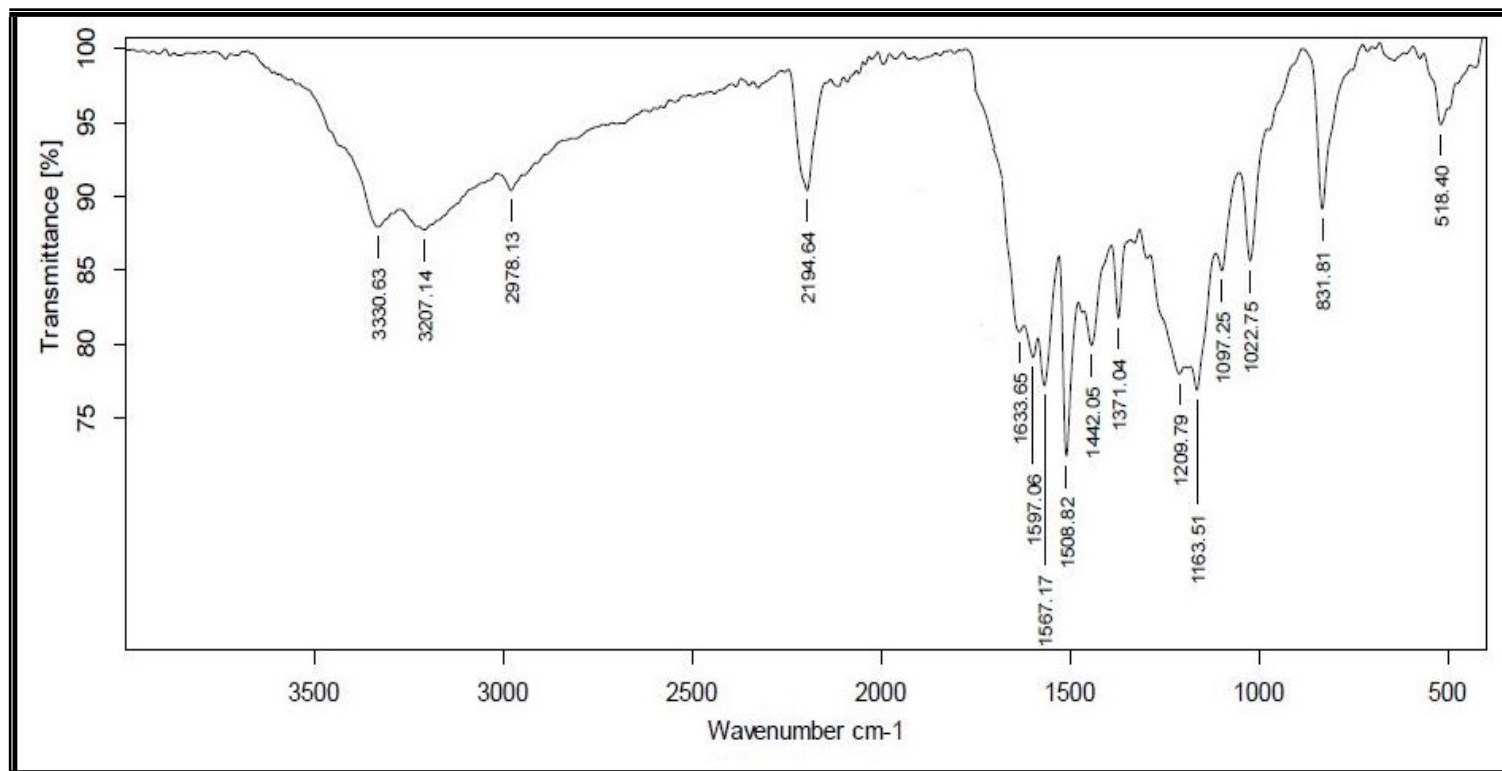

Figure S1. IR Spectrum of Compound (2a)

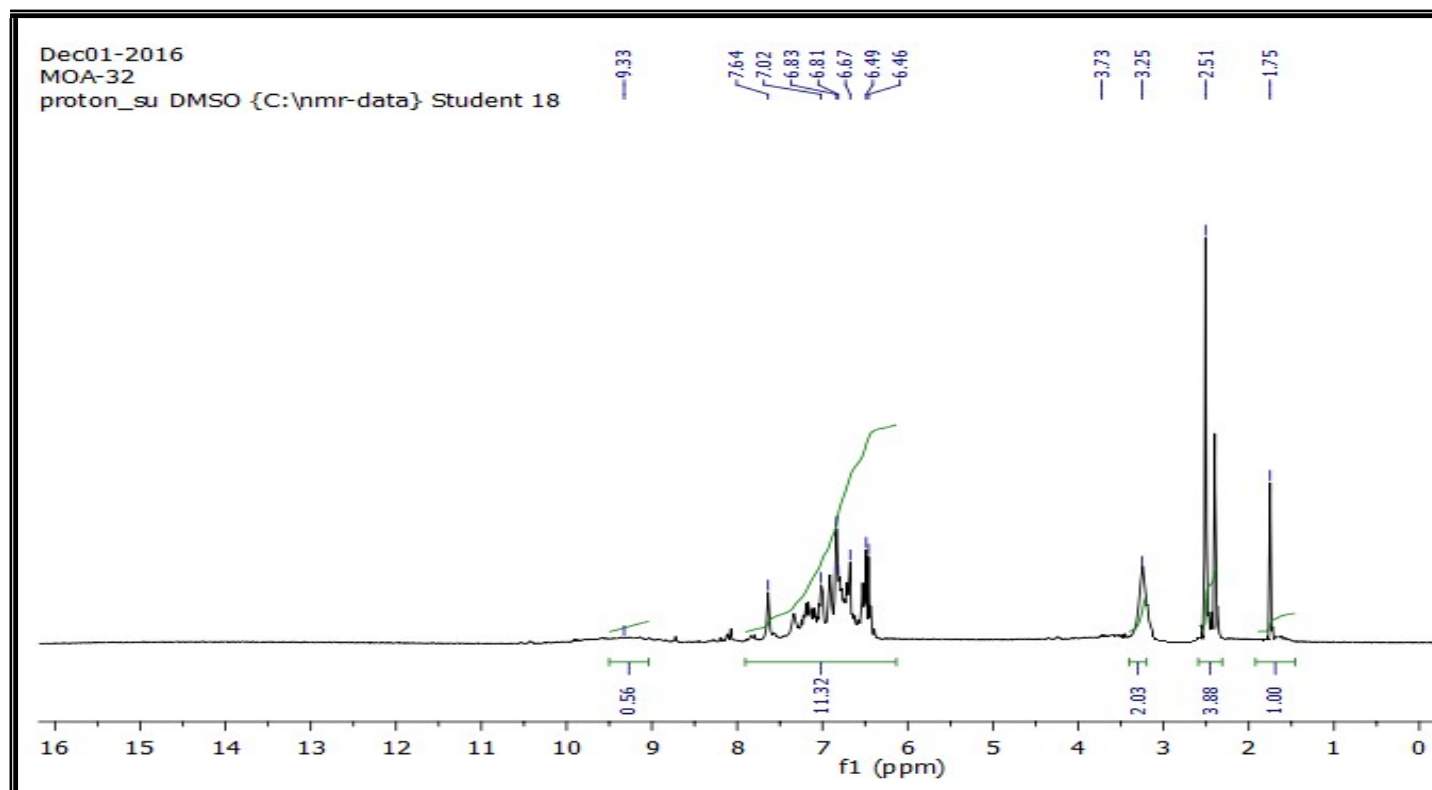

**Figure S2.**  $^1\text{H}$  NMR Spectrum of Compound (2a)

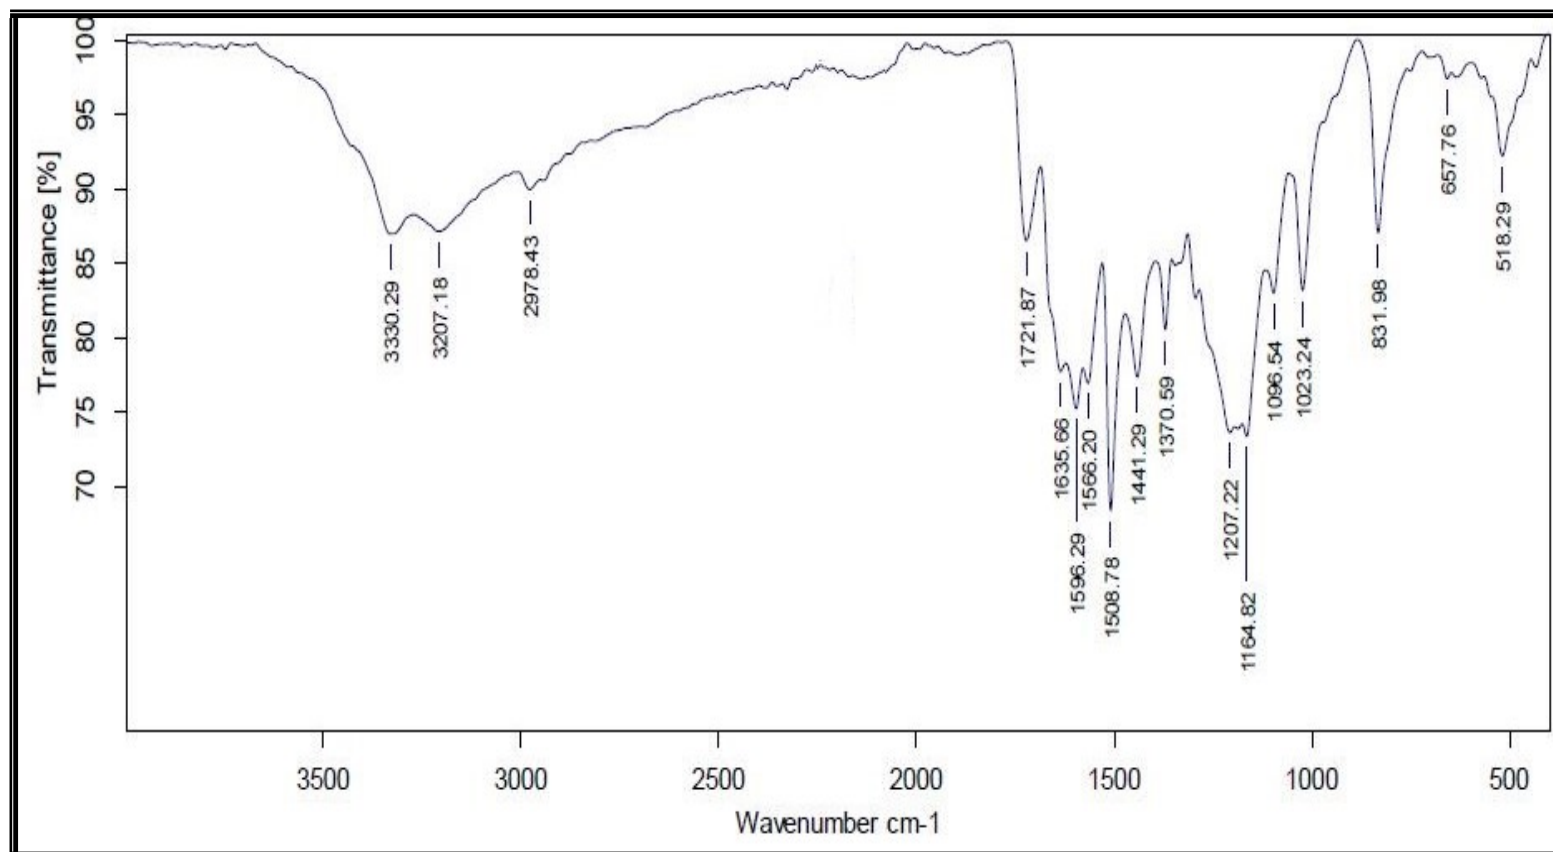

**Figure S3.** IR Spectrum of Compound (2b)

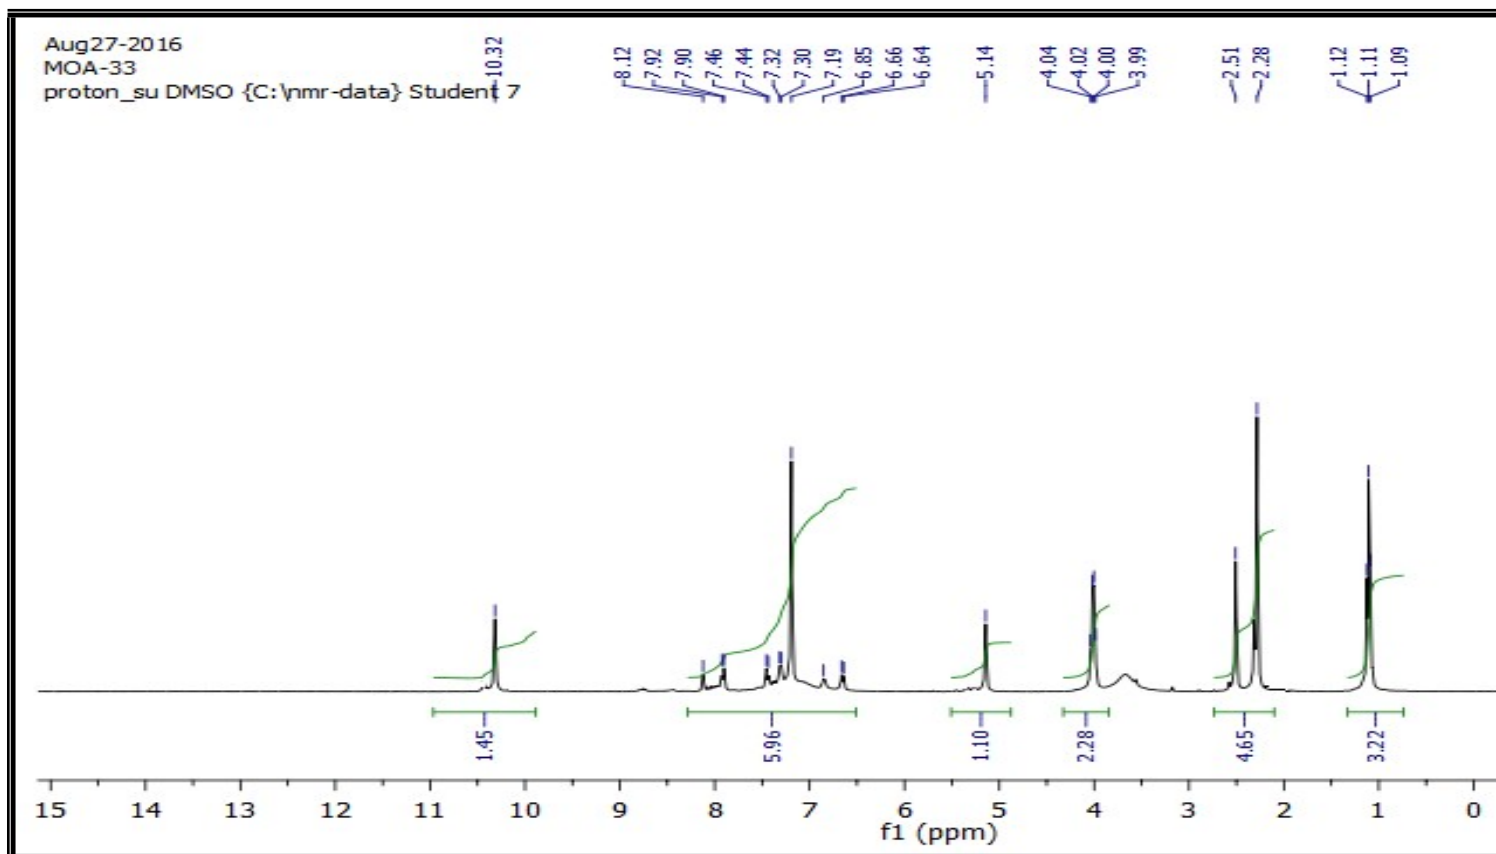

**Figure S4.**  $^1\text{H}$  NMR Spectrum of Compound (2b)

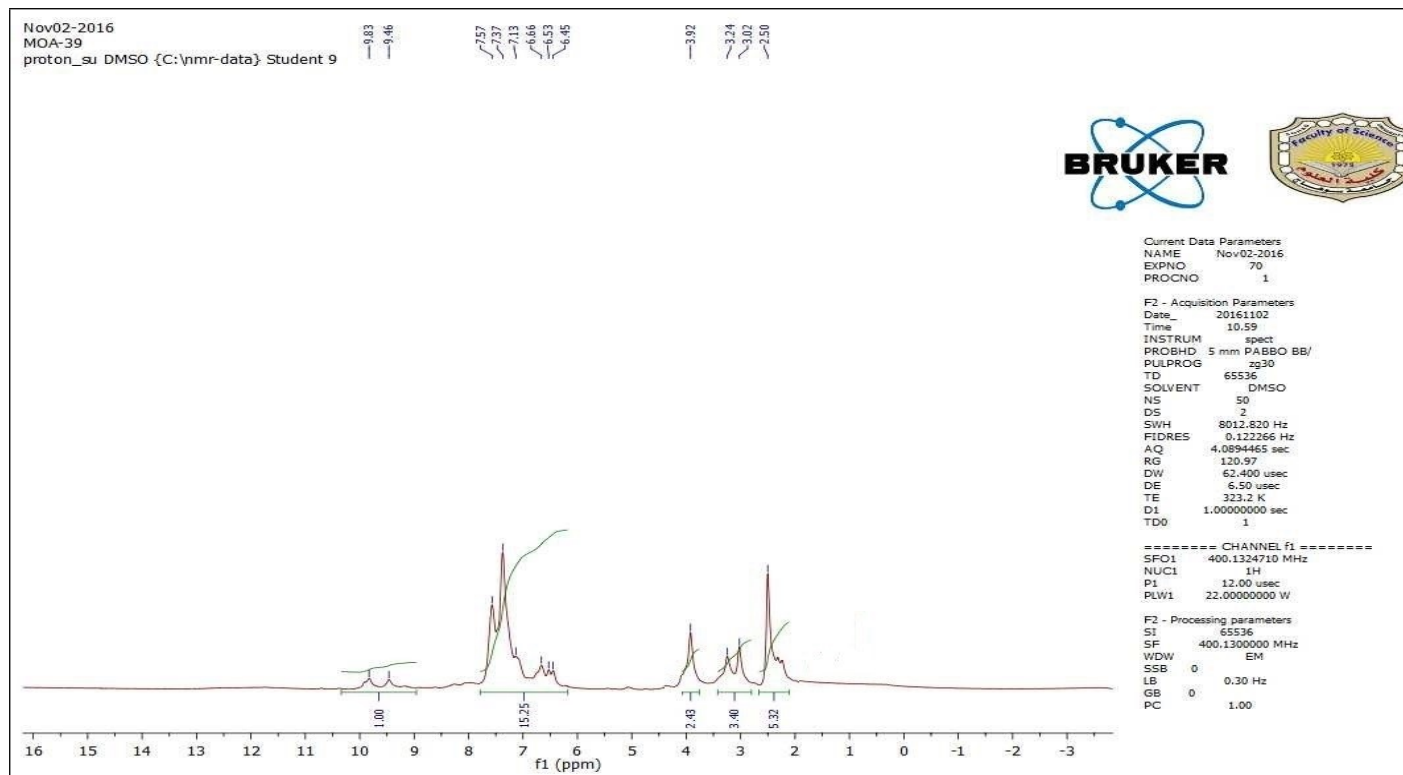

Figure S5.  $^1\text{H}$  NMR Spectrum of Compound (3)

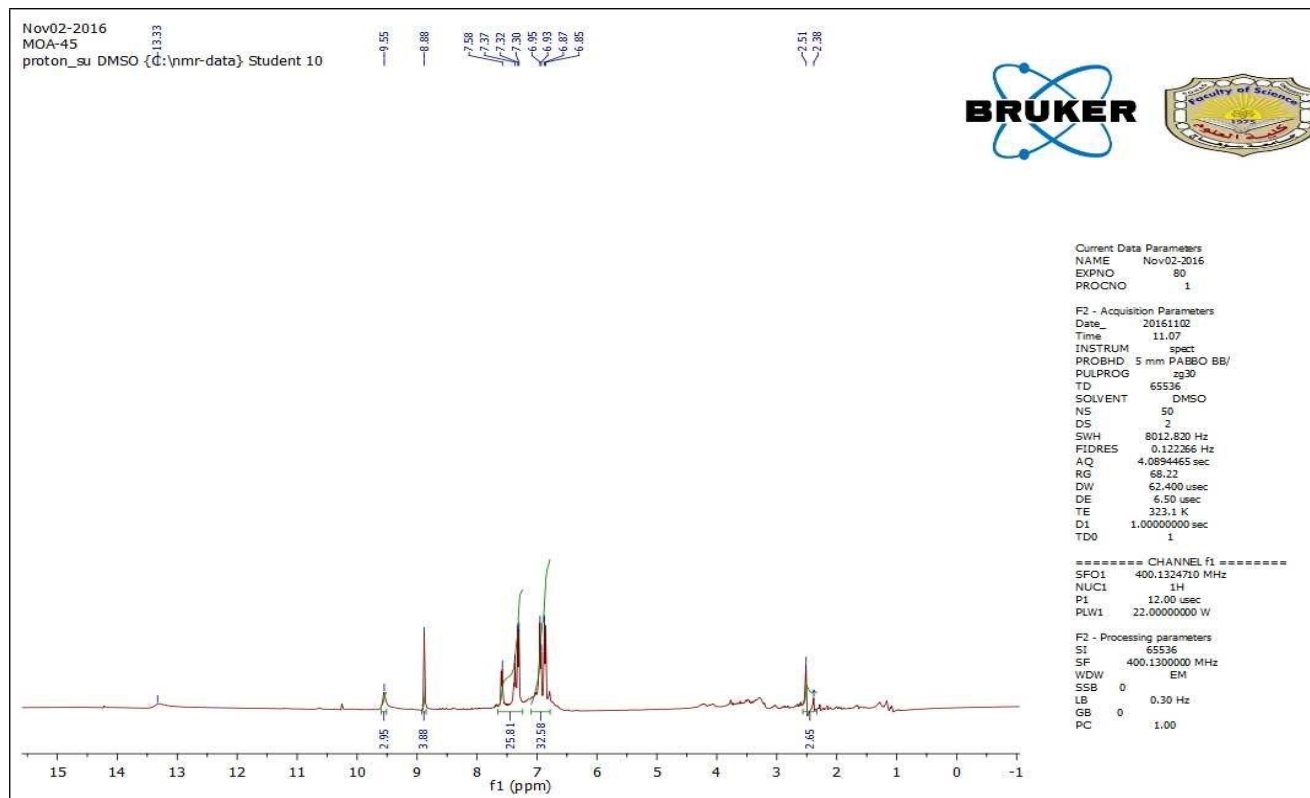

**Figure S6.**  $^1\text{H}$  NMR Spectrum of Compound (4)

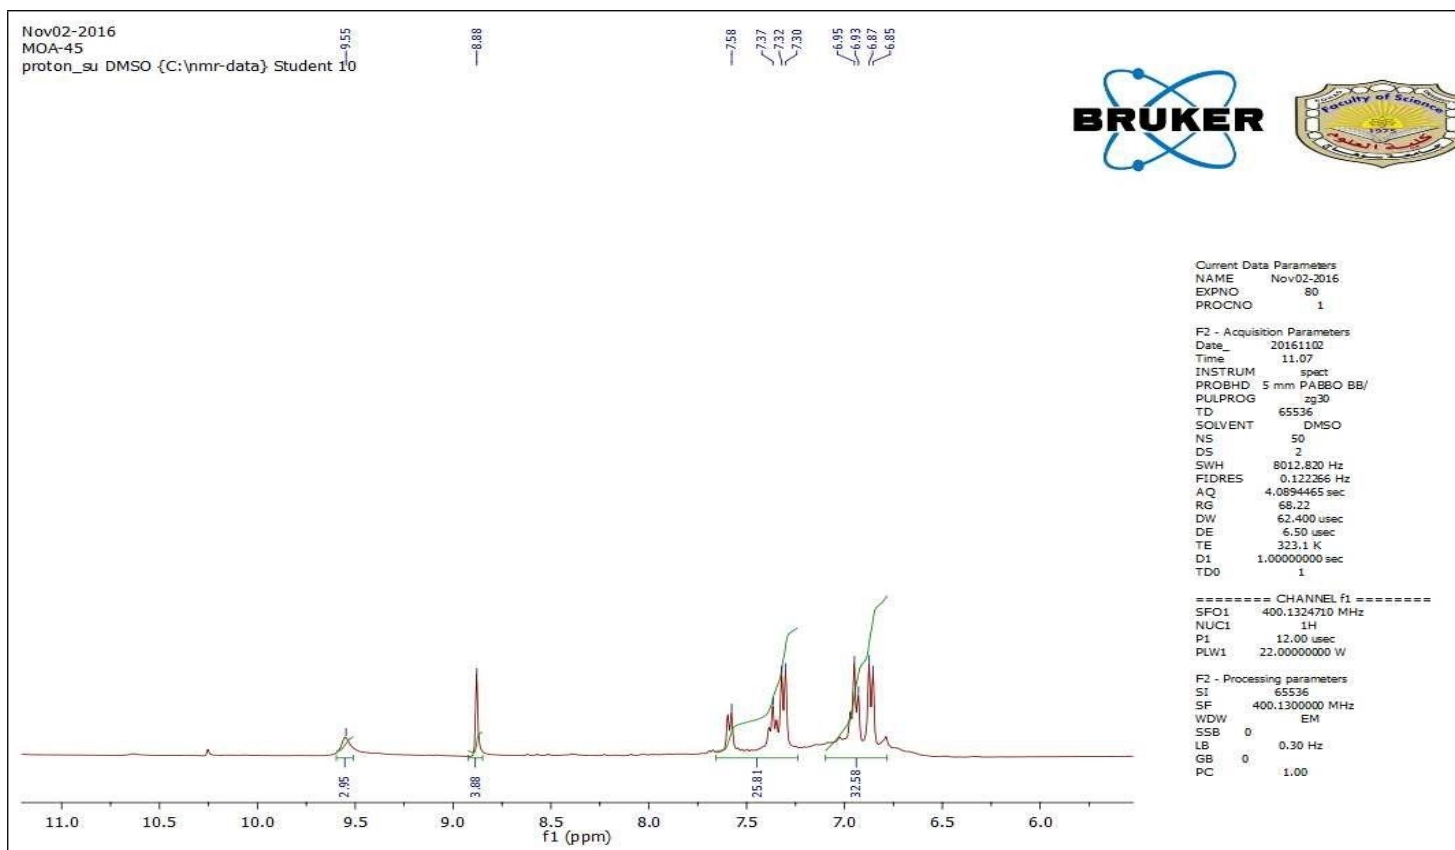

Figure S7.  $^1\text{H}$  NMR Spectrum of Compound (4)

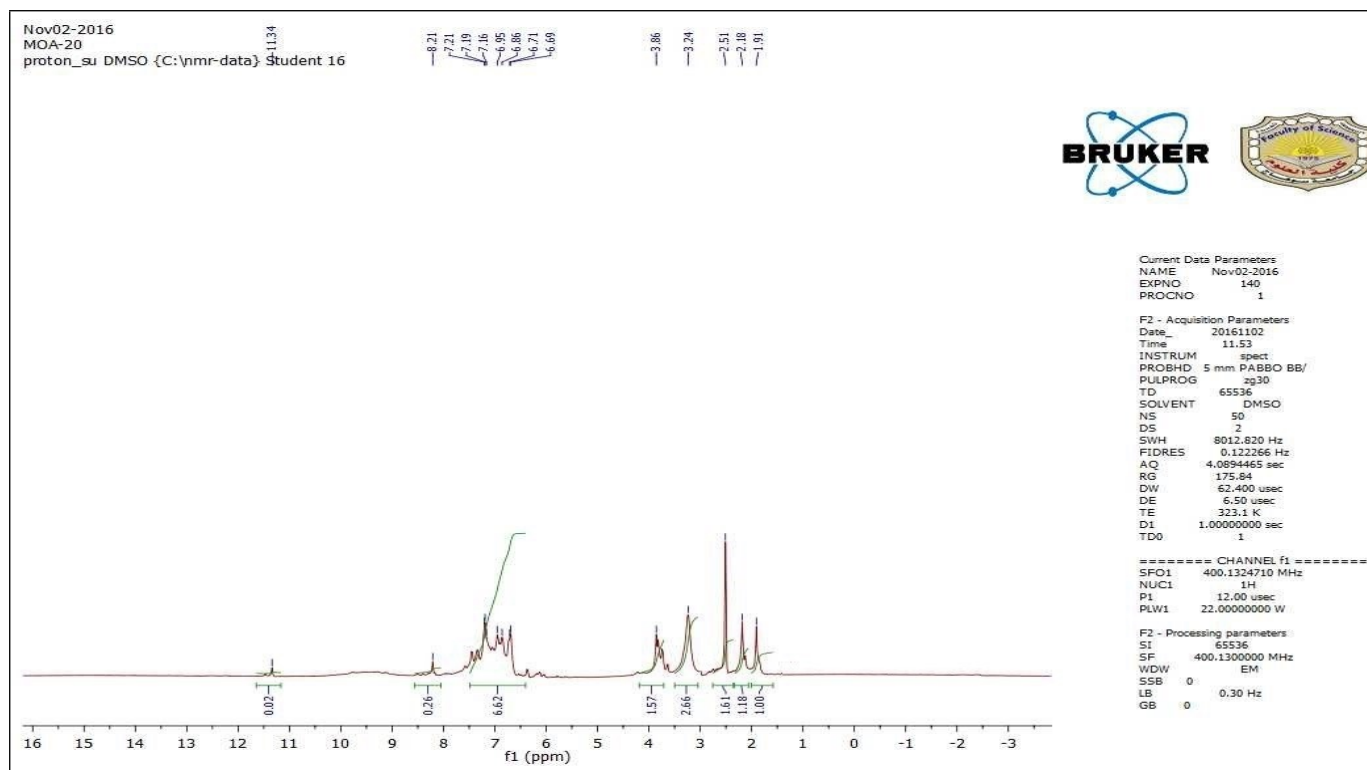

Figure S8.  $^1\text{H}$  NMR Spectrum of Compound (5)



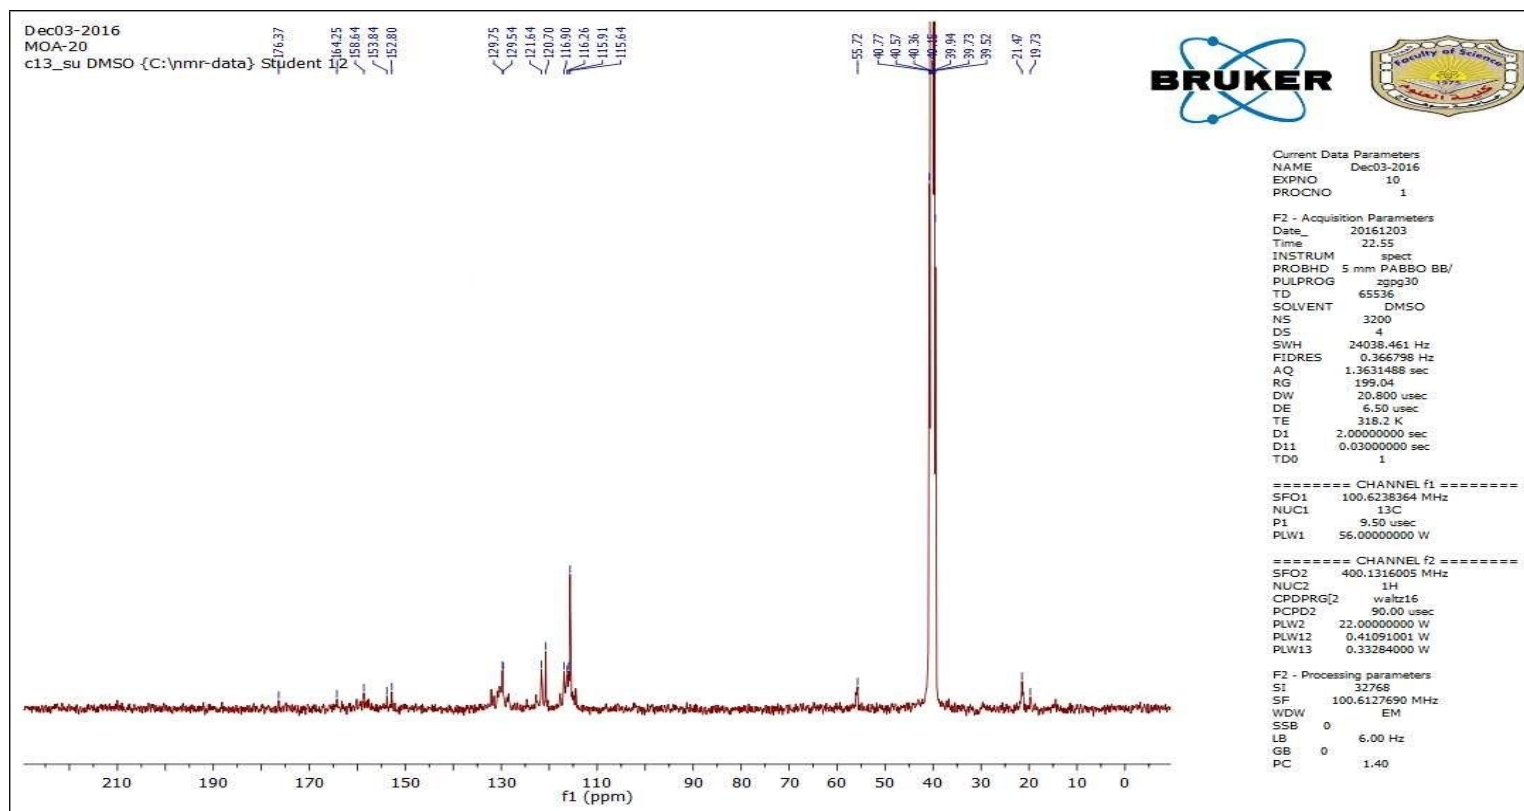

Figure S9. <sup>13</sup>C NMR Spectrum of Compound (5)

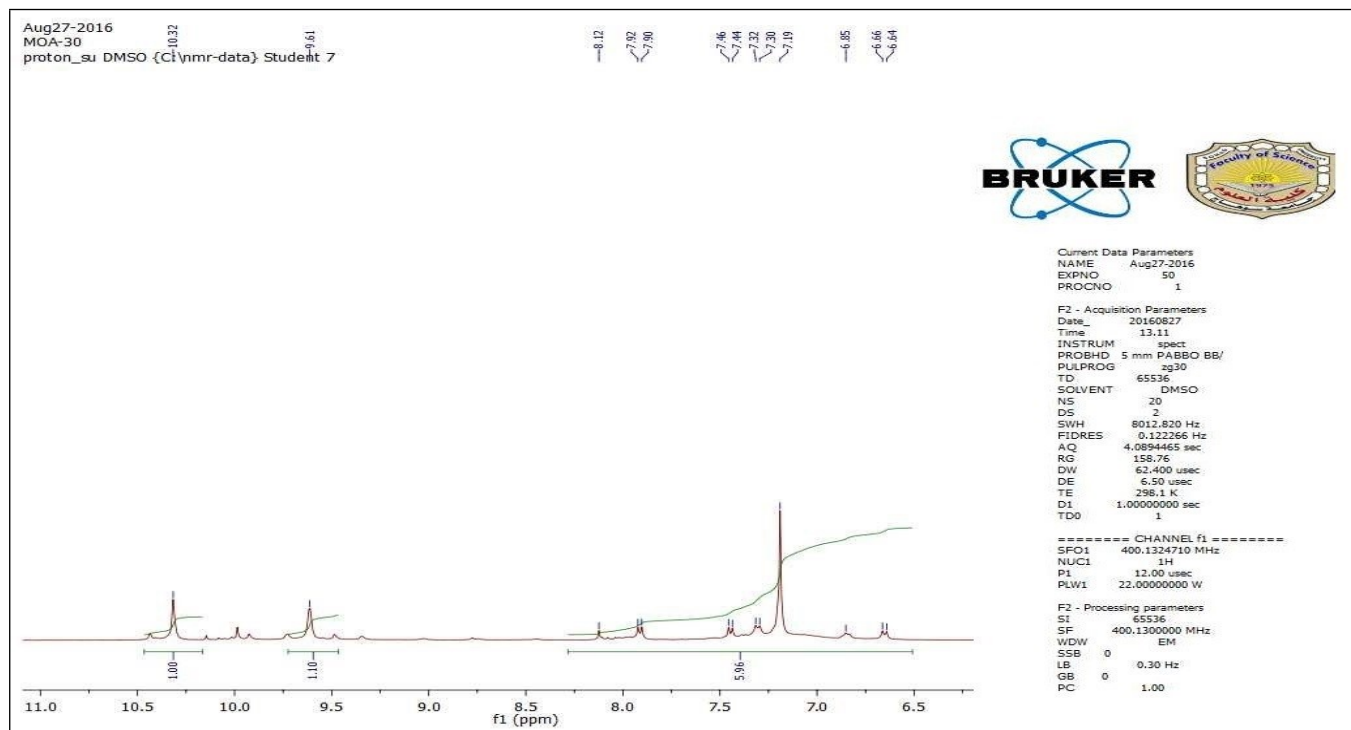

**Figure S10.**  $^1\text{H}$  NMR Spectrum of Compound (6a)

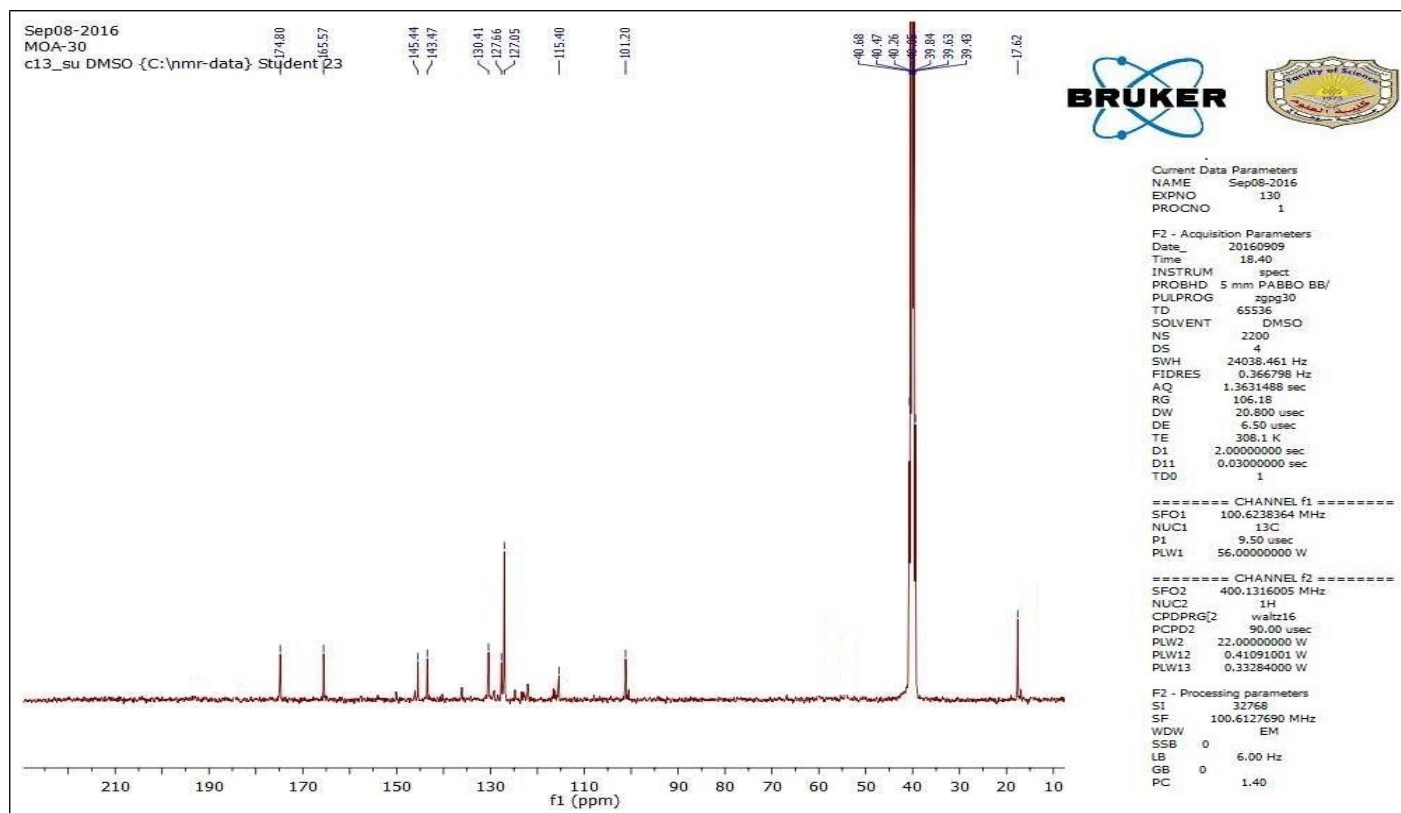

Figure S11.  $^{13}\text{C}$  NMR Spectrum of Compound (6a)

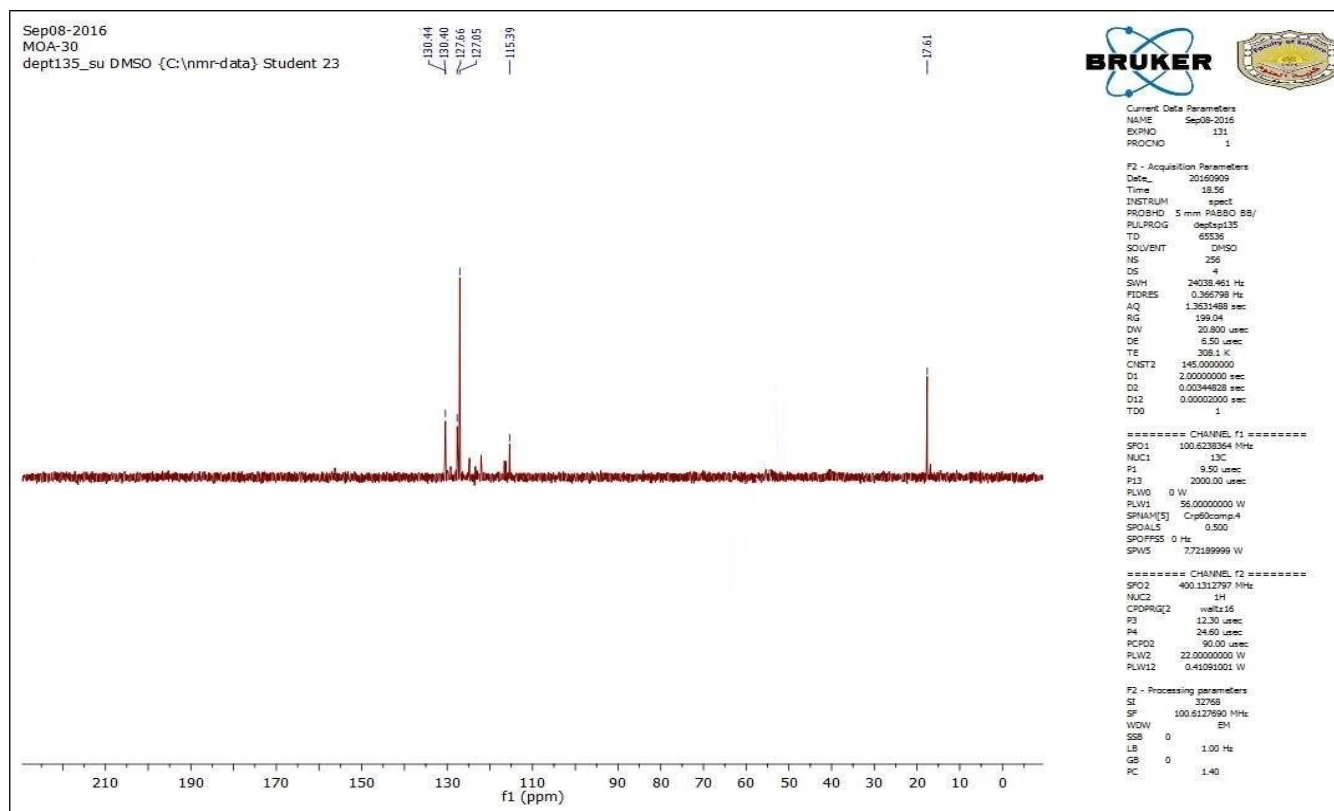

Figure S12. DEPT 135  $^{13}\text{C}$  NMR Spectrum of Compound (6a)

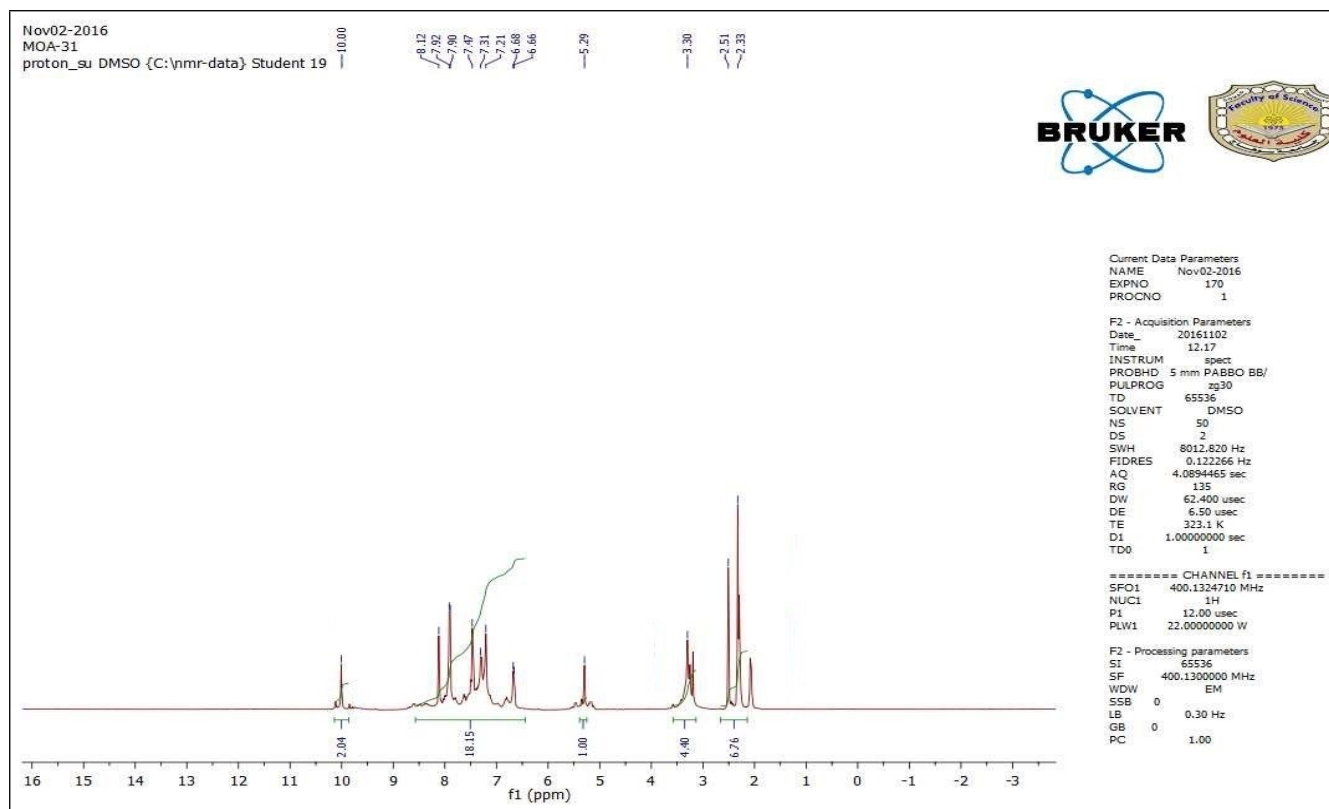

**Figure S13.**  $^1\text{H}$  NMR Spectrum of Compound (6b)

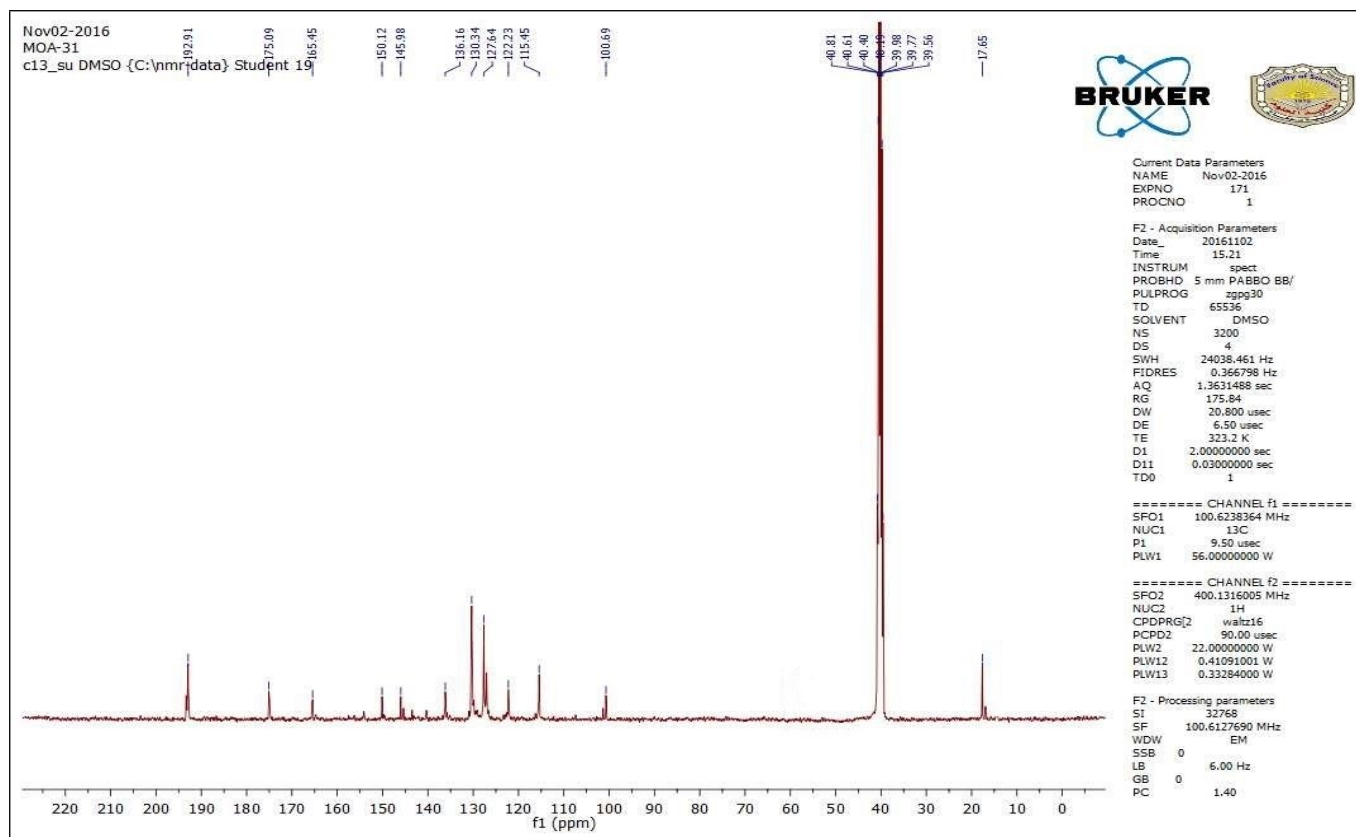

**Figure S14.**  $^{13}\text{C}$  NMR Spectrum of Compound (6b)

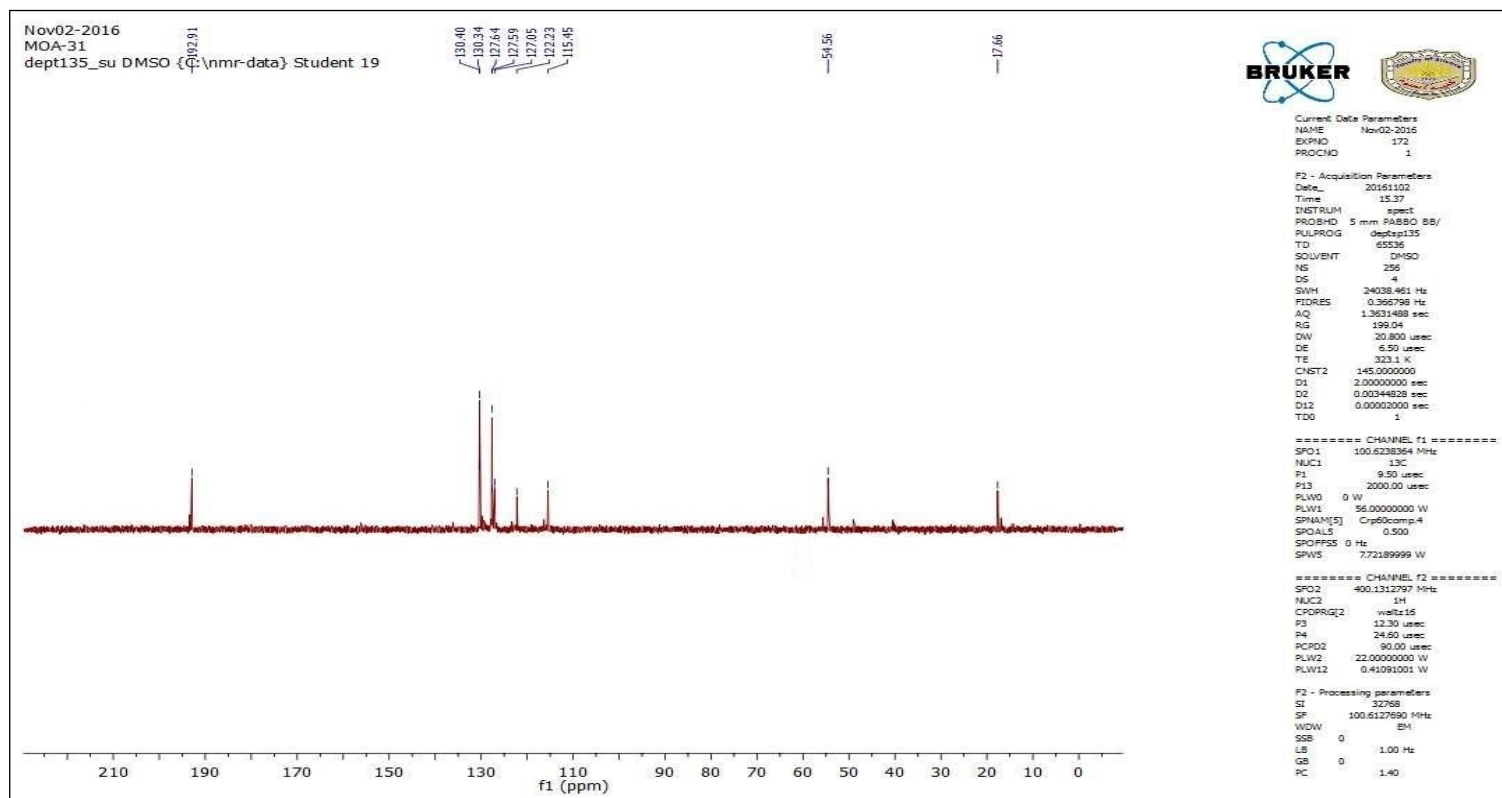

Figure S15. DEPT 135  $^{13}\text{C}$  NMR Spectrum of Compound (6b)

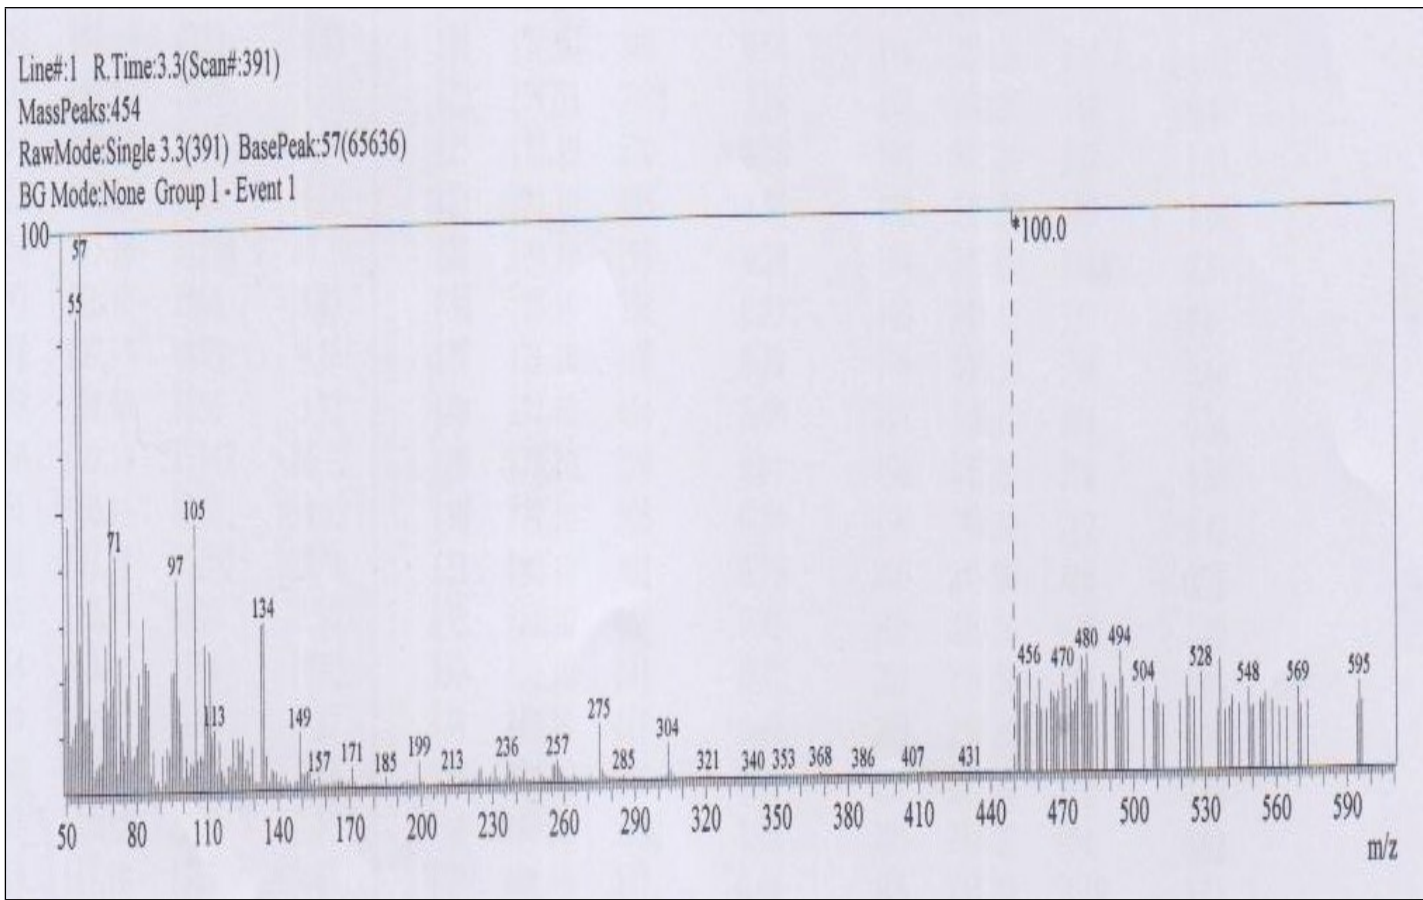

Figure S16. Mass Spectrum of Compound (6b)



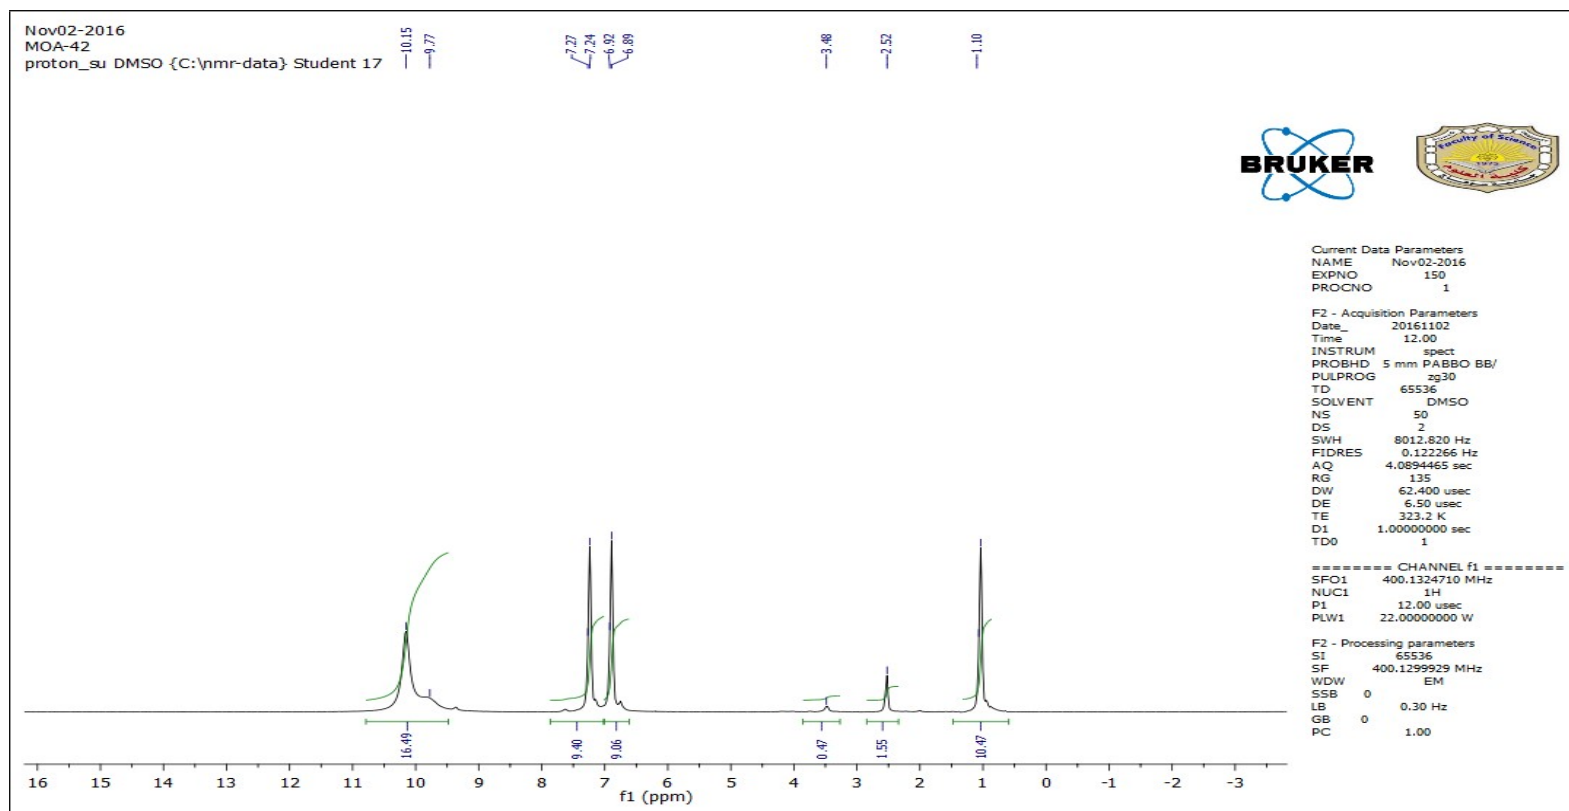

Figure S17.  $^1\text{H}$  NMR Spectrum of Compound (7)

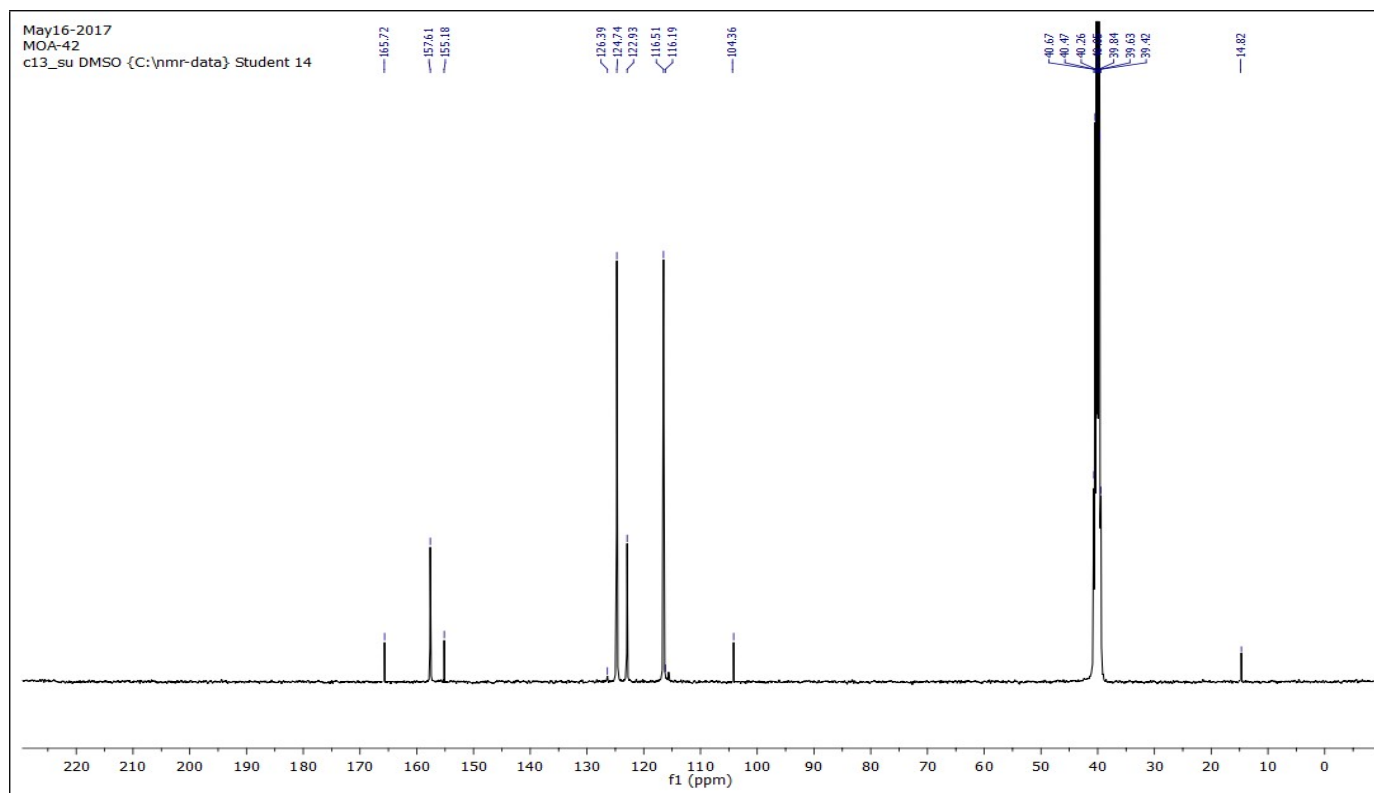

**Figure S18.**  $^{13}\text{C}$  NMR Spectrum of Compound (7)

### Cairo University Micro Analytical Center

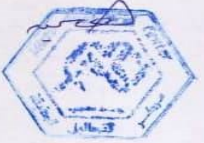

#### DI Analysis Shimadzu Qp-2010 Plus

Sample Information  
 Analyzed by : Noha Bagato.  
 Analyzed : 23/05/2017 05:13:03 م  
 Sample Name : MOA 42  
 Sample ID :  
 Customer Name : علوم القاهرة - د. جهاد جادوي - نسمة  
 Data File : C:\GCMSolution\Data\Project1\MOA 42.QGD  
 Org Data File : C:\GCMSolution\Data\Project1\MOA 42.QGD  
 Method File : C:\GCMSolution\Data\Project1\High Temperature Op  
 Org Method File : C:\GCMSolution\System\Tune1\\_default.qgt  
 Report File :  
 Tuning File : C:\GCMSolution\System\Tune1\\_default.qgt  
 SEndTSModified by : Noha Bagato.  
 Modified : 23/05/2017 05:19:08 م

Method  
 Analytical Line 1  
 IonSourceTemp : 250.00 °C  
 [MS Table]  
 --Group 1 - Event 1--  
 Start Time : 0.00min  
 End Time : 10.00min  
 ACQ Mode : Scan  
 Event Time : 0.50sec  
 Scan Speed : 1428  
 Start m/z : 50.00  
 End m/z : 700.00  
 Electron Voltage : 70 eV  
 Ionization Mode : EI

C:\GCMSolution\Data\Project1\MOA 42.QGD

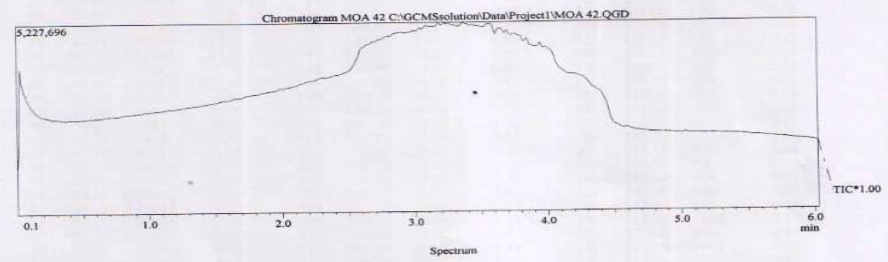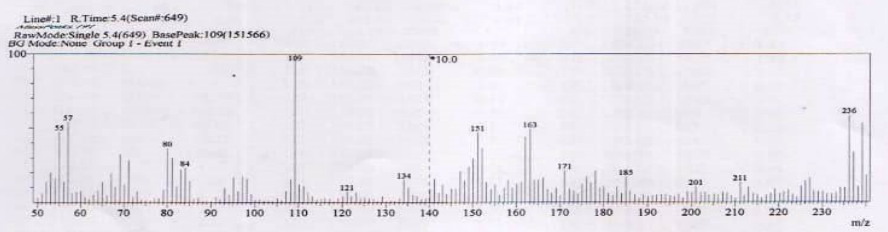

Mass Table  
 Line#1 R.Time:5.4(Scan#:649)  
 MassPeaks:191  
 RawMode:Single 5.4(649) BasePeak:109(151566)  
 BG Mode:None Group 1 - Event 1

| # | m/z   | Abs. In | Rel. Int. | # | m/z   | Abs. In | Rel. Int. | # | m/z   | Abs. In | Rel. Int. |
|---|-------|---------|-----------|---|-------|---------|-----------|---|-------|---------|-----------|
| 1 | 50.00 | 4220    | 2.78      | 4 | 53.05 | 30180   | 19.91     | 7 | 56.05 | 21125   | 13.94     |
| 2 | 51.00 | 9295    | 6.13      | 5 | 54.05 | 23974   | 15.82     | 8 | 57.05 | 81868   | 54.01     |
| 3 | 52.05 | 20728   | 13.68     | 6 | 55.05 | 71625   | 47.26     | 9 | 58.05 | 9073    | 5.99      |

Figure S19. Mass Spectrum of Compound (7)

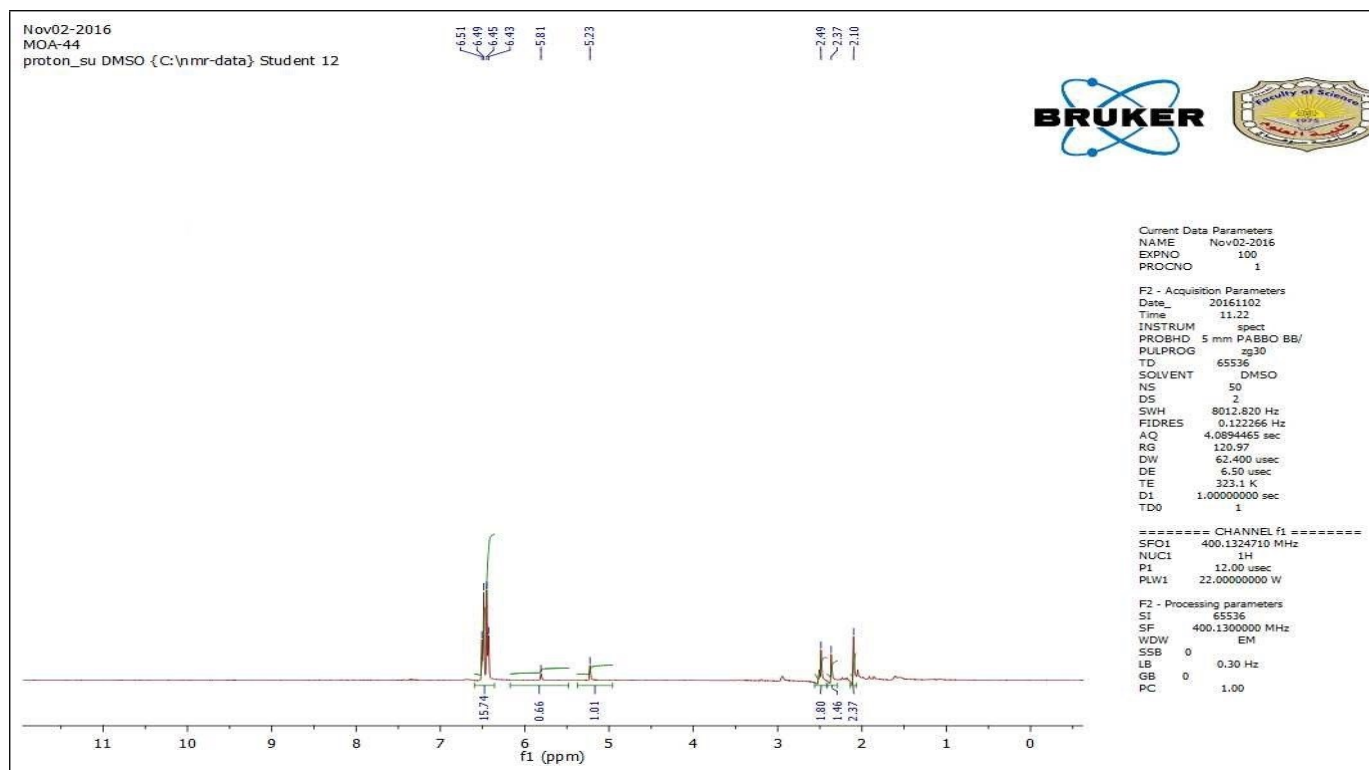

**Figure S20.**  $^1\text{H}$  NMR Spectrum of Compound (8)

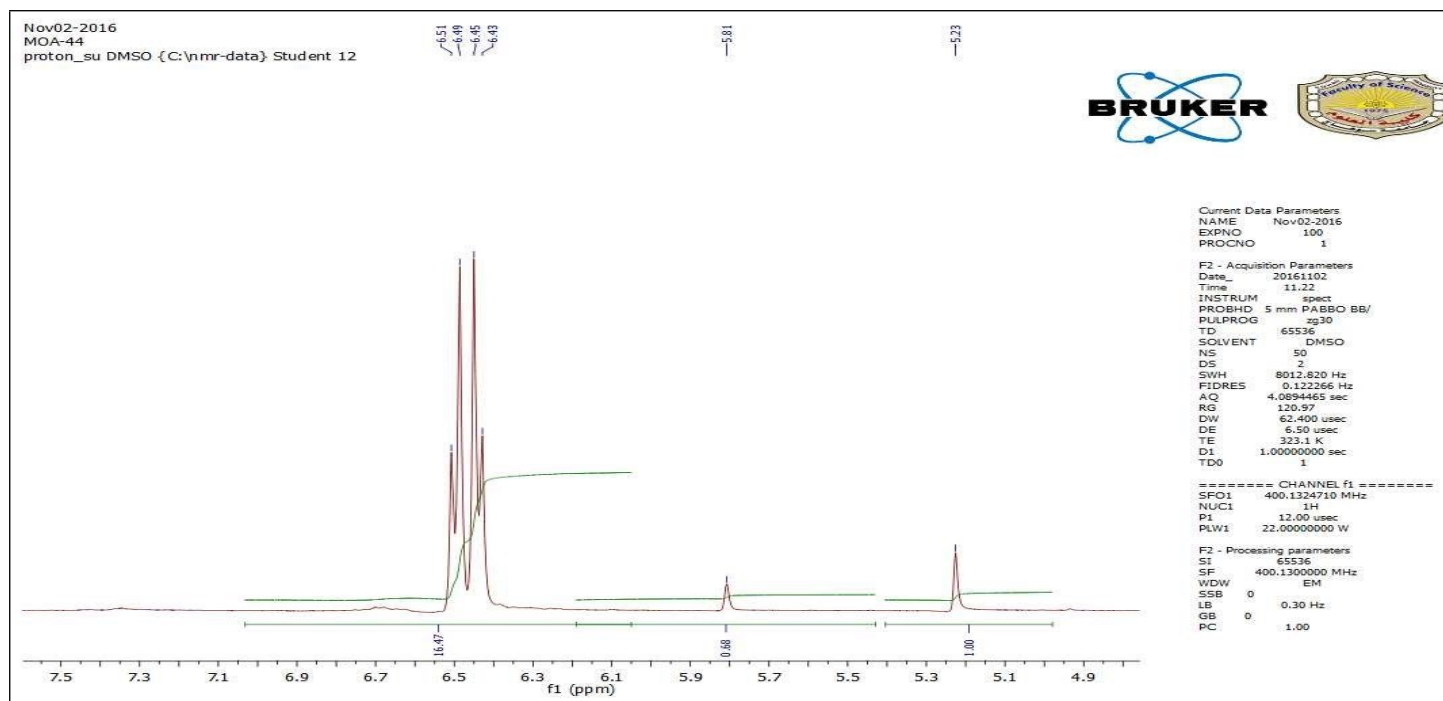

**Figure S21.**  $^1\text{H}$  NMR Spectrum of Compound (8)

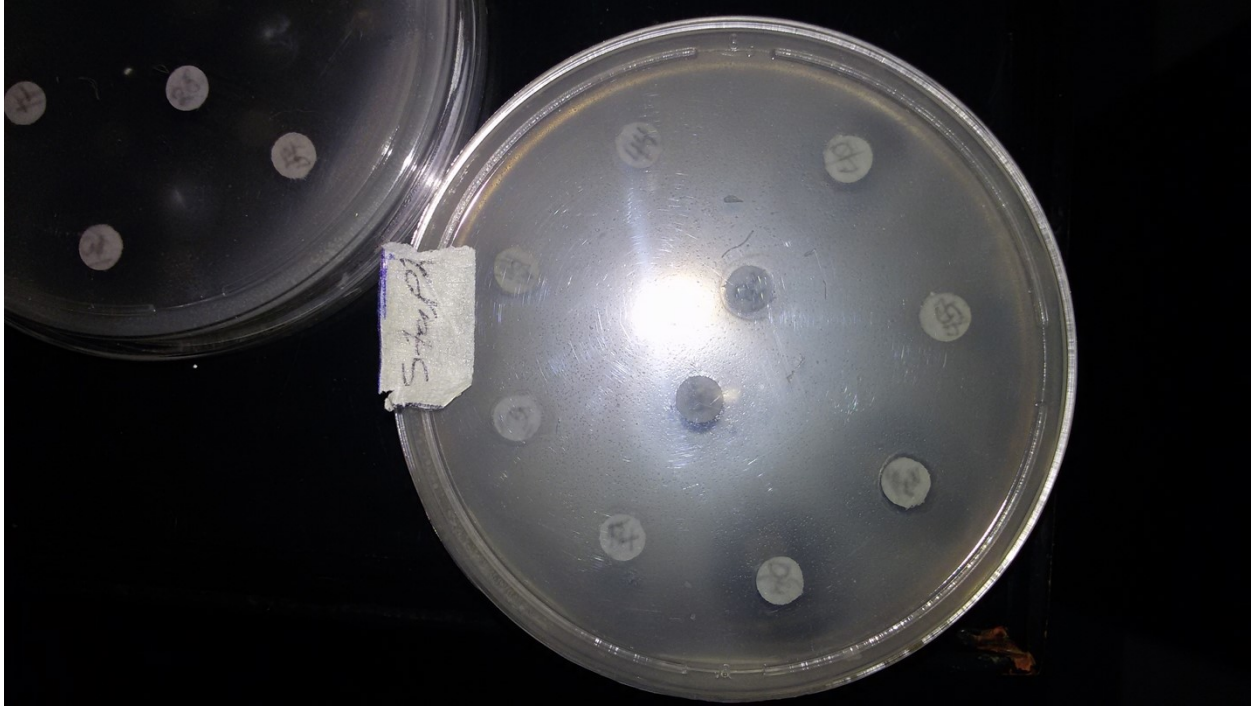

S-101/21

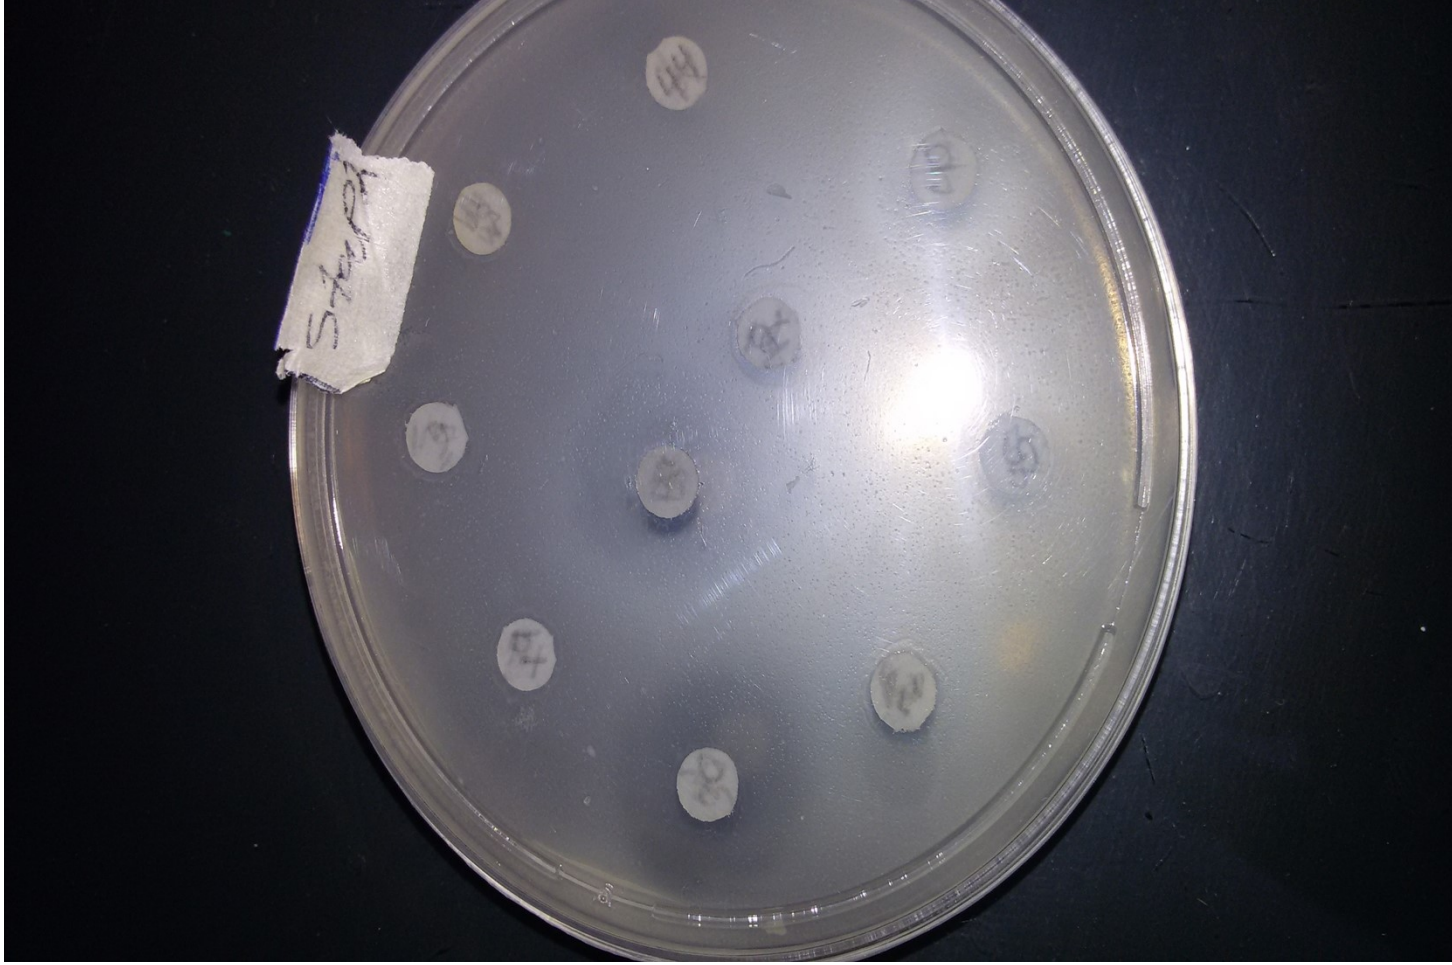

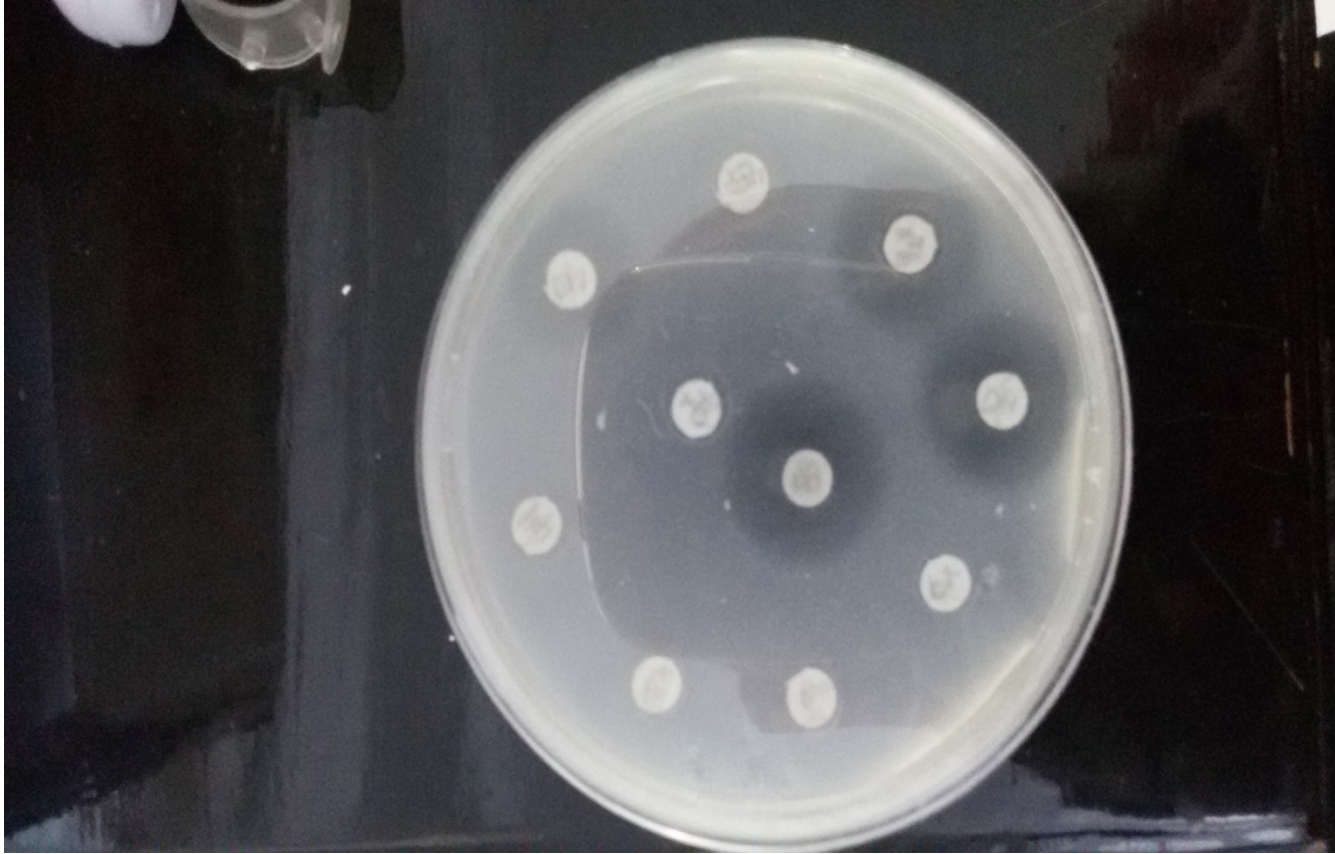



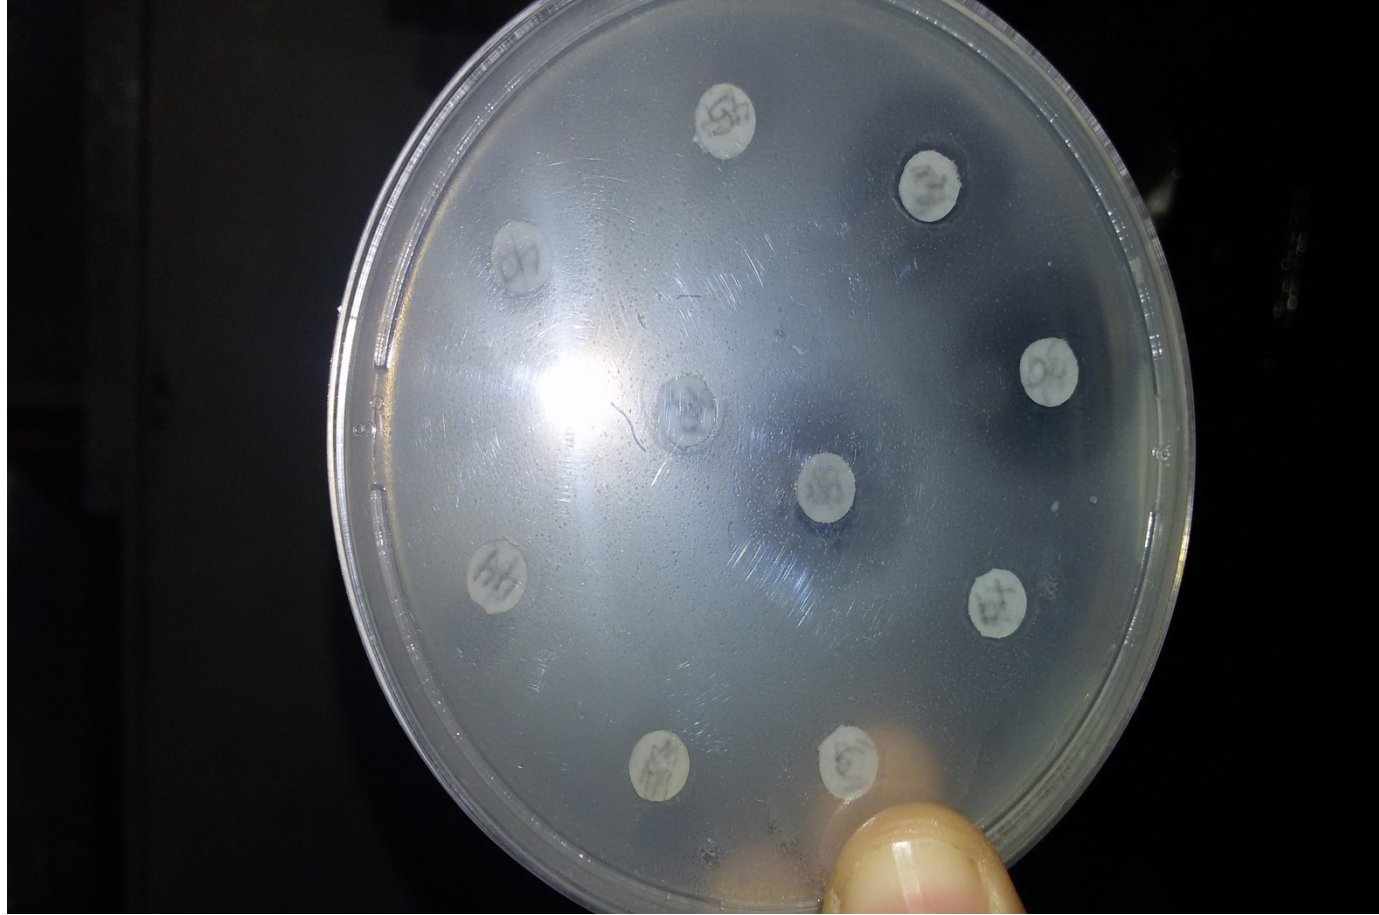

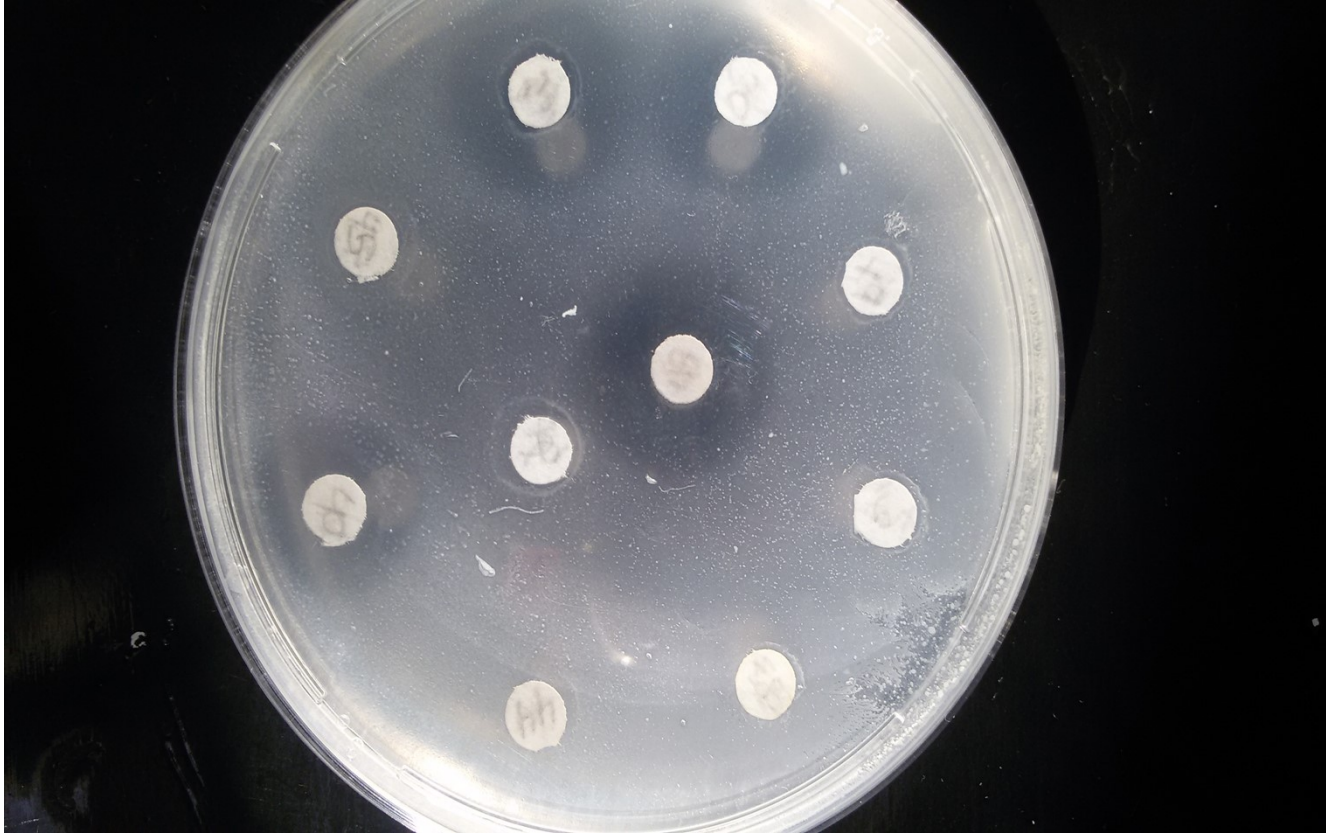

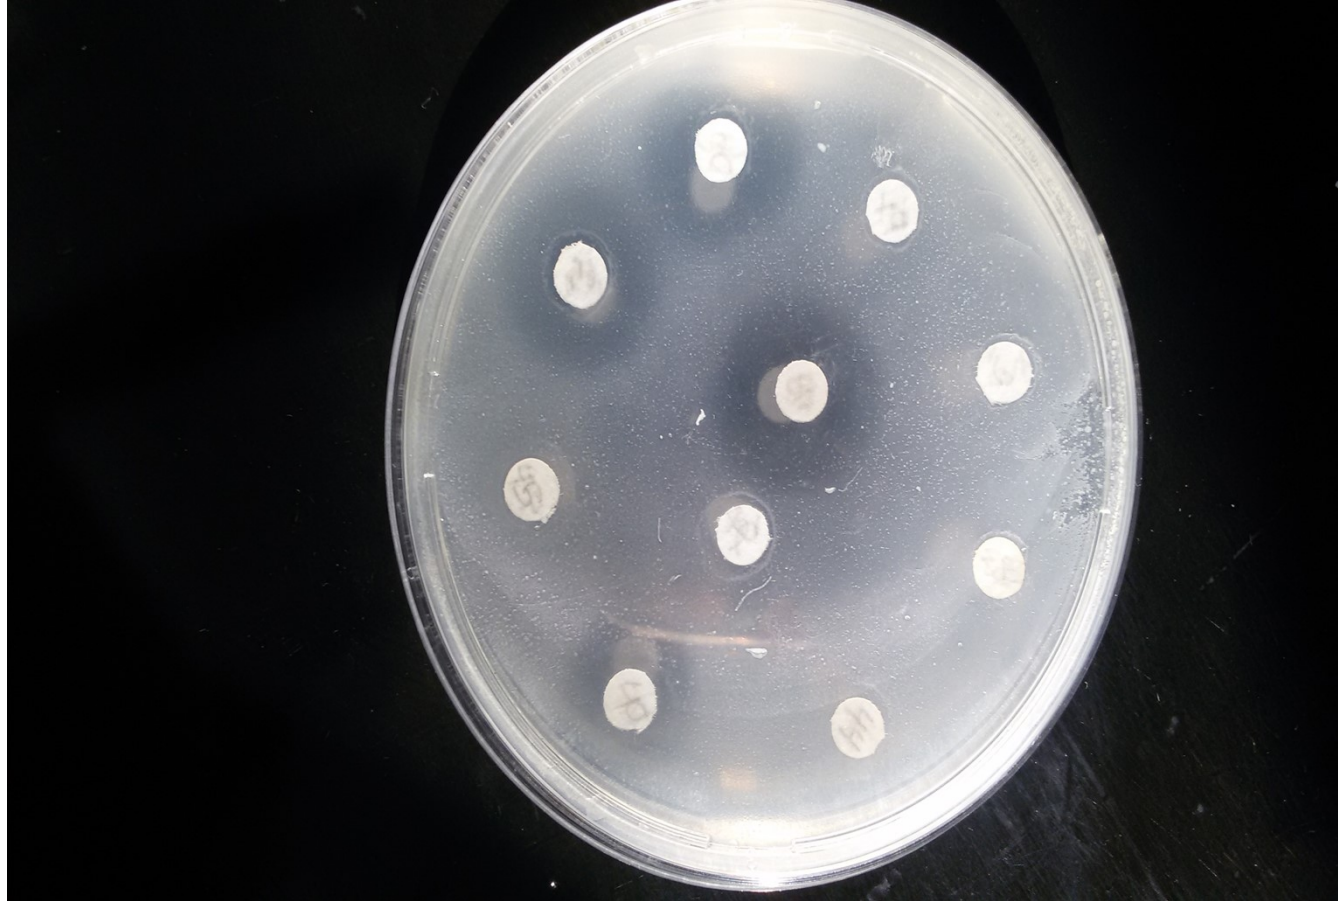

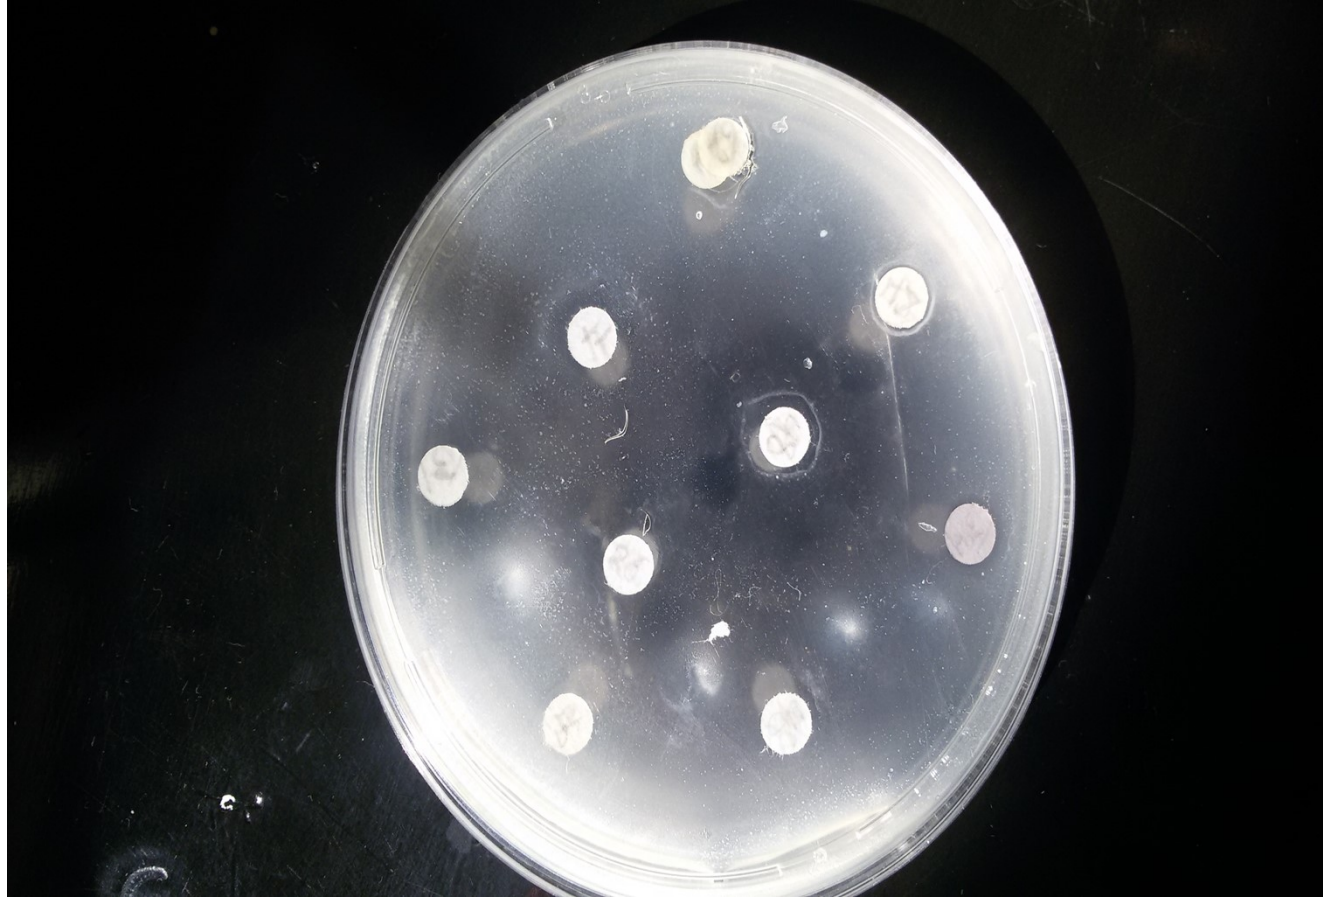

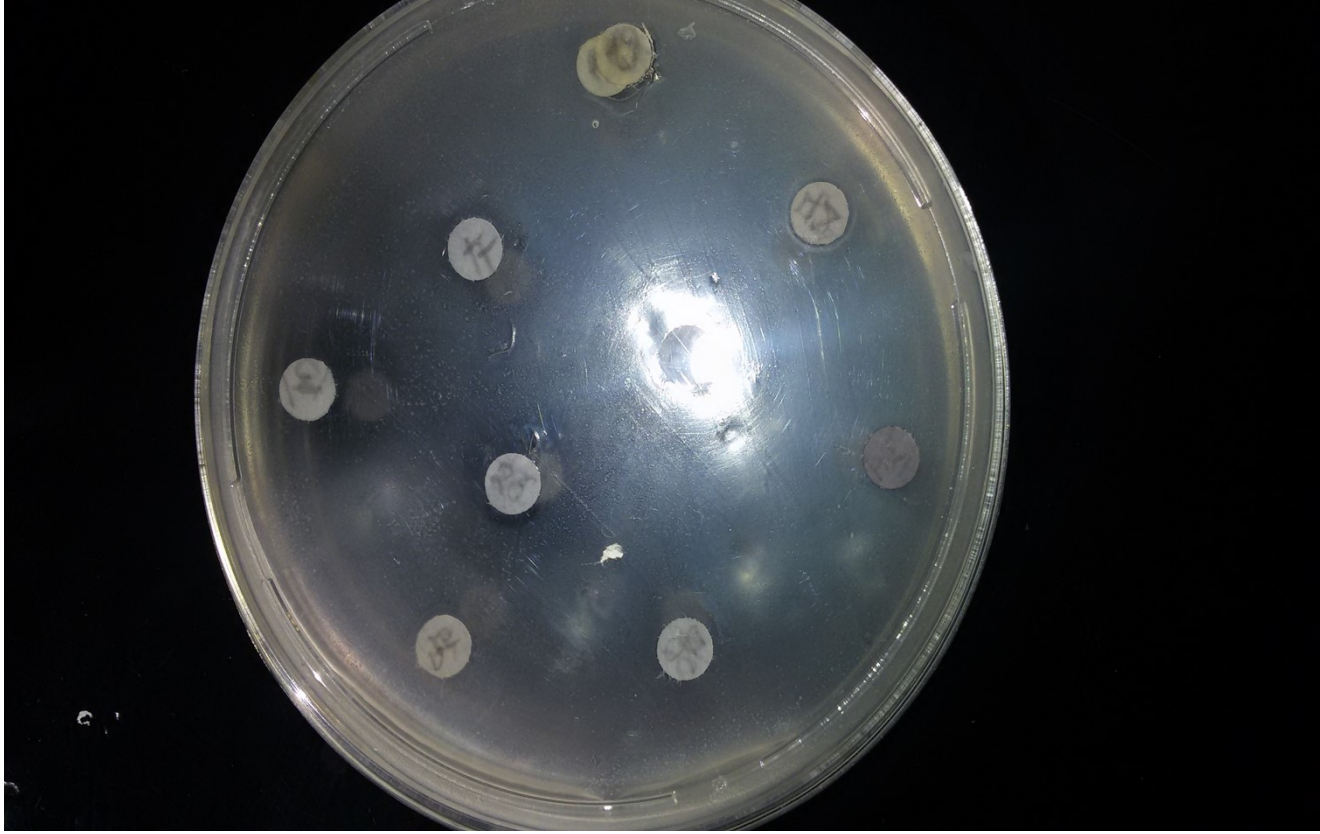

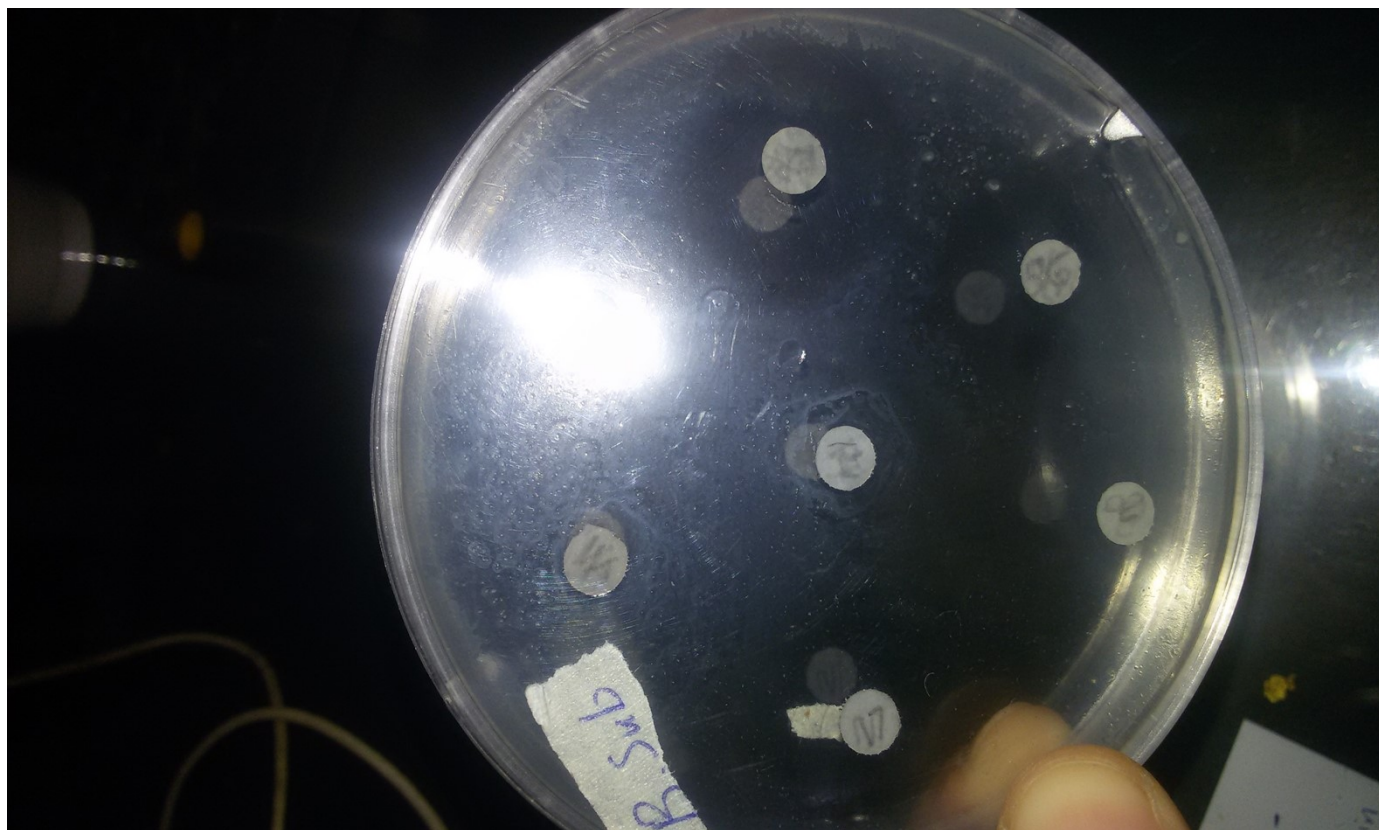

**Figures S22.** Antibacterial activity of compounds against pathogenic bacterial strains *Escherichia coli*, *Staphylococcus haemolyticus*, *Kocuria kristinae*, *Enterococcus casseliflavus*, and *Bacillus cereus*.

Card Type: GP Testing Instrument: VITEK 2

Bionumber: 050402123720221

Organism Quantity:

Comments:

---



---



---

|                                                                                                          |                                               |                       |                                                                      |
|----------------------------------------------------------------------------------------------------------|-----------------------------------------------|-----------------------|----------------------------------------------------------------------|
| Identification Information                                                                               | Card: GP                                      | Lot Number: 242381940 | Expires: May 29, 2017 12:00 EEST                                     |
|                                                                                                          | Completed: Mar 16, 2017 14:12 EET             | Status: Final         | Analysis Time: 7.00 hours                                            |
| Selected Organism                                                                                        | 86% Probability<br>Bionumber: 050402123720221 |                       | Staphylococcus haemolyticus<br>Confidence: Acceptable Identification |
| SRF Organism                                                                                             |                                               |                       |                                                                      |
| Analysis Organisms and Tests to Separate:                                                                |                                               |                       |                                                                      |
| Analysis Messages:                                                                                       |                                               |                       |                                                                      |
| Contraindicating Typical Biopattern(s)<br>Staphylococcus haemolyticus SAC(57),AlaA(7),dGAL(77),POLYB(1). |                                               |                       |                                                                      |

|    |      |   |    |       |   |    |       |   |    |       |   |    |       |   |    |       |   |
|----|------|---|----|-------|---|----|-------|---|----|-------|---|----|-------|---|----|-------|---|
| 2  | AMY  | - | 4  | PIPLC | - | 5  | dXYL  | - | 8  | AOH1  | + | 9  | BGAL  | - | 11 | AGLU  | + |
| 13 | APPA | - | 14 | COEX  | - | 15 | AspA  | - | 16 | BGAR  | - | 17 | AMAN  | - | 19 | PHOS  | + |
| 20 | LeuA | - | 23 | ProA  | - | 24 | BQUPr | - | 25 | AGAL  | - | 26 | PyrA  | + | 27 | BGUR  | - |
| 28 | AlaA | + | 29 | TyrA  | - | 30 | dSOR  | - | 31 | URE   | - | 32 | POLYB | + | 37 | dGAL  | - |
| 38 | dRIB | + | 39 | LATk  | + | 42 | LAC   | - | 44 | NAG   | + | 45 | dMAL  | + | 46 | BAC   | - |
| 47 | NOVO | - | 50 | NCE5  | + | 52 | dMAN  | - | 53 | dBINE | - | 54 | MBUG  | - | 56 | PUL   | - |
| 57 | dRAF | - | 58 | O129R | + | 59 | SAL   | - | 60 | SAC   | - | 62 | dTRE  | - | 63 | ADH2a | - |
| 64 | OPTD | + |    |       |   |    |       |   |    |       |   |    |       |   |    |       |   |

Figure (8): Identification report of bacterial isolate (*Staphylococcus haemolyticus*) using VITEK 2 system.

BiNumber: 120200601563571  
Organism Quantity:

Comments:

|                                                                                |                                              |                       |                                                                    |
|--------------------------------------------------------------------------------|----------------------------------------------|-----------------------|--------------------------------------------------------------------|
| Identification Information                                                     | Card: GP                                     | Lot Number: 242381940 | Expires: May 29, 2017 13:00 EEST                                   |
|                                                                                | Completed: Mar 18, 2017 15:59 EET            | Status: Final         | Analysis Time: 3.75 hours                                          |
| Selected Organism                                                              | 96% Probability<br>BiNumber: 120200601563571 |                       | Enterococcus casseliflavus<br>Confidence: Excellent identification |
| SRF Organism                                                                   |                                              |                       |                                                                    |
| Analysis Organisms and Tests to Separate:                                      |                                              |                       |                                                                    |
| Analysis Messages:                                                             |                                              |                       |                                                                    |
| Contraindicating Typical Biopattern(s)<br>Enterococcus casseliflavus AMAN(24). |                                              |                       |                                                                    |

|    |      |   |    |       |   |    |       |   |    |      |   |    |       |   |    |       |   |
|----|------|---|----|-------|---|----|-------|---|----|------|---|----|-------|---|----|-------|---|
| 2  | AMY  | + | 4  | PIPLC | - | 5  | dXYL  | - | 8  | ADH1 | - | 9  | BGAL  | + | 11 | AGLU  | - |
| 13 | APPA | - | 14 | CDEX  | - | 15 | AspA  | - | 16 | BGAR | - | 17 | AMAN  | + | 19 | PHOS  | - |
| 20 | LeuA | - | 23 | ProA  | - | 24 | BGUPr | - | 25 | AGAL | - | 26 | PyrA  | - | 27 | BGUR  | - |
| 28 | AlaA | - | 29 | TyrA  | + | 30 | dSOR  | + | 31 | URE  | - | 32 | POLYB | - | 37 | dGAL  | - |
| 38 | dRIB | + | 39 | ILATk | - | 42 | LAC   | - | 44 | NAG  | + | 45 | dMAL  | - | 46 | BACI  | - |
| 47 | NOVO | - | 50 | NC6.5 | + | 52 | dMAN  | + | 53 | dMNE | + | 54 | MBdG  | + | 56 | PUL   | - |
| 57 | dRAF | + | 58 | O129R | - | 59 | SAL   | + | 60 | SAC  | + | 62 | dTRE  | + | 63 | ADH2s | - |
| 64 | OPTO | + |    |       |   |    |       |   |    |      |   |    |       |   |    |       |   |

Figure (6): Identification report of bacterial isolate (*Enterococcus casseliflavus*) using VITEK 2 system.



|                                       |                        |             |                                      |                |                         |       |   |    |      |   |    |       |   |    |       |   |
|---------------------------------------|------------------------|-------------|--------------------------------------|----------------|-------------------------|-------|---|----|------|---|----|-------|---|----|-------|---|
| Card:                                 | GP                     | Lot Number: | 242381940                            | Expires:       | May 29, 2017 19:00 EEST |       |   |    |      |   |    |       |   |    |       |   |
| Completed:                            | Mar 16, 2017 12:43 EET | Status:     | Final                                | Analysis Time: | 5:50 hours              |       |   |    |      |   |    |       |   |    |       |   |
| 95% Probability                       | Kocuria kristinae      |             |                                      |                |                         |       |   |    |      |   |    |       |   |    |       |   |
| Bionumber:                            | 050032102000201        |             | Confidence: Very good identification |                |                         |       |   |    |      |   |    |       |   |    |       |   |
| Organisms and Tests to Separate:      |                        |             |                                      |                |                         |       |   |    |      |   |    |       |   |    |       |   |
| Special Messages:                     |                        |             |                                      |                |                         |       |   |    |      |   |    |       |   |    |       |   |
| Identifying Typical Biopattern(s): -  |                        |             |                                      |                |                         |       |   |    |      |   |    |       |   |    |       |   |
| Kocuria kristinae TyrA(79), O129R(7). |                        |             |                                      |                |                         |       |   |    |      |   |    |       |   |    |       |   |
| Biochemical Details                   |                        |             |                                      |                |                         |       |   |    |      |   |    |       |   |    |       |   |
| ADP                                   | -                      | 4           | PIPLC                                | -              | 5                       | dXYL  | - | 8  | ADH1 | + | 9  | BGAL  | - | 11 | AGLU  | + |
| ALP                                   | -                      | 14          | CDEX                                 | -              | 15                      | AspA  | - | 16 | BGAR | - | 17 | AMAN  | - | 19 | PHOS  | - |
| ALAL                                  | +                      | 23          | ProA                                 | +              | 24                      | BGURr | - | 25 | AGAL | - | 26 | PyrA  | + | 27 | BGUR  | - |
| AKF                                   | +                      | 29          | TyrA                                 | -              | 30                      | dSOR  | - | 31 | URE  | - | 32 | POLYB | - | 37 | dGAL  | - |
| ARF                                   | -                      | 39          | ILATx                                | +              | 42                      | LAC   | - | 44 | NAG  | - | 45 | dMAL  | - | 46 | BACI  | - |
| ND10                                  | -                      | 50          | NC6.5                                | -              | 52                      | dMAN  | - | 53 | dMNE | - | 54 | MBdG  | - | 56 | PLL   | - |
| RF                                    | -                      | 58          | O129R                                | +              | 59                      | SAL   | - | 60 | SAC  | - | 62 | dTRE  | - | 63 | ADH2s | - |
| PTD                                   | -                      |             |                                      |                |                         |       |   |    |      |   |    |       |   |    |       |   |

(7): Identification report of bacterial isolate (*Kocuria kristinae*)  
VITEK 2 system.

Figure S23. BIOMERIEUX VITEK2 SYSTEM-bio number analysis
